# Supplementary material
Source: Research Square preprint supplement (doi:10.21203/rs.3.rs-9074474/v1)
Supplement: Supplementary file 1 [file 250890e10267fab13eecd8d1.xlsx]

## Sheet: EVALUATION OF BURDEN AND QUA...
Age	Sex	Marital status	Educational Level	Employment status	Relationship with the patient	Monthly income (Naira)	How long have you been a caregiver for the patient?	I feel that caregiving has negatively impacted my physical health	I feel stressed due to my caregiving responsibilities	I feel isolated from family and friends because of caregiving	I feel that caregiving is taking too much of my time	I feel that caregiving has affected my financial stability	I feel I do not have enough support to manage caregiving responsibilities.	I feel emotionally drained because of caregiving	I feel resentful toward the patient because of caregiving.	Your overall health	Your physical ability to perform daily activities	Your emotional well-being	Your personal relationships	Your financial stability	Your ability to cope with stress	The level of support you receive from others	Your satisfaction with your caregiving	_id	_uuid	_submission_time	_validation_status	_notes	_status	_submitted_by	__version__	_tags	meta/rootUuid	_index
	Male	Single	Tertiary education	Employed (full-time)	Child		Less than 6 months	Never	Rarely	Never	Rarely	Rarely	Never	Never	Never	Satisfied	Satisfied	Neutral	Very satisfied	Satisfied	Satisfied	Satisfied	Satisfied	509900055	923fadf6-3a55-4854-afc6-2281d2ff0fc6	2025-07-03 13:11:59			submitted_via_web		vg72TbC2cYx2XL4zA5ftJK		uuid:923fadf6-3a55-4854-afc6-2281d2ff0fc6	1
52	Female	Married	Primary education	Self-employed	Sibling	20,000-50,000	More than 3 years	Never	Never	Never	Never	Never	Never	Never	Never	Very satisfied	Very satisfied	Very satisfied	Very satisfied	Satisfied	Satisfied	Satisfied	Satisfied	509909328	8902a998-4502-49b8-b91f-ff85436d5c73	2025-07-03 13:22:40			submitted_via_web		vg72TbC2cYx2XL4zA5ftJK		uuid:8902a998-4502-49b8-b91f-ff85436d5c73	2
16	Female	Single	Secondary education	Self-employed	Child	Below 20,000	More than 3 years	Never	Never	Never	Never	Never	Never	Sometimes	Never	Very satisfied	Very satisfied	Neutral	Very satisfied	Neutral	Very satisfied	Very satisfied	Very satisfied	509910657	e04b5507-e486-4868-824f-091d676d9471	2025-07-03 13:24:44			submitted_via_web		vg72TbC2cYx2XL4zA5ftJK		uuid:e04b5507-e486-4868-824f-091d676d9471	3
20	Male	Single	Secondary education	Employed (part-time)	Child	50,000-100,000	More than 3 years	Sometimes	Quite often	Never	Rarely	Never	Sometimes	Always	Never	Very satisfied	Very satisfied	Dissatisfied	Satisfied	Very dissatisfied	Very satisfied	Neutral	Very satisfied	509911537	645b11e9-4e00-47fa-bc82-18707fa1b7fc	2025-07-03 13:26:06			submitted_via_web		vg72TbC2cYx2XL4zA5ftJK		uuid:645b11e9-4e00-47fa-bc82-18707fa1b7fc	4
42	Male	Married	Secondary education	Self-employed	Sibling	Above 100,000	More than 3 years	Never	Sometimes	Never	Quite often	Quite often	Always	Never	Never	Satisfied	Satisfied	Satisfied	Very satisfied	Dissatisfied	Very satisfied	Dissatisfied	Very satisfied	509912252	2a48ae2a-9f7f-411a-9d21-fba66bb04f43	2025-07-03 13:27:09			submitted_via_web		vg72TbC2cYx2XL4zA5ftJK		uuid:2a48ae2a-9f7f-411a-9d21-fba66bb04f43	5
37	Male	Married	Secondary education	Self-employed	Spouse	Above 100,000	Less than 6 months	Never	Sometimes	Never	Quite often	Always	Always	Quite often	Never	Very satisfied	Very satisfied	Dissatisfied	Satisfied	Very dissatisfied	Satisfied	Dissatisfied	Very satisfied	509913013	5eb3685a-0a22-4205-b5b7-89071a66ccf8	2025-07-03 13:28:26			submitted_via_web		vg72TbC2cYx2XL4zA5ftJK		uuid:5eb3685a-0a22-4205-b5b7-89071a66ccf8	6
33	Female	Married	Tertiary education	Employed (full-time)	Sibling	Above 100,000	More than 3 years	Never	Rarely	Never	Never	Never	Sometimes	Rarely	Never	Neutral	Very satisfied	Satisfied	Satisfied	Neutral	Very dissatisfied	Dissatisfied	Neutral	509914424	5d90019d-5127-420e-b0dd-b0d8f391f02d	2025-07-03 13:30:27			submitted_via_web		vg72TbC2cYx2XL4zA5ftJK		uuid:5d90019d-5127-420e-b0dd-b0d8f391f02d	7
25	Male	Single	Secondary education	Unemployed	Sibling	Below 20,000	More than 3 years	Never	Never	Never	Always	Sometimes	Never	Quite often	Never	Very satisfied	Very satisfied	Neutral	Satisfied	Dissatisfied	Very satisfied	Satisfied	Satisfied	509928640	3223c3d4-0c09-4546-9878-a4af0d48a9b1	2025-07-03 13:47:06			submitted_via_web		vg72TbC2cYx2XL4zA5ftJK		uuid:3223c3d4-0c09-4546-9878-a4af0d48a9b1	8
34	Female	Married	Secondary education	Self-employed	Child	50,000-100,000	More than 3 years	Never	Never	Never	Sometimes	Sometimes	Never	Sometimes	Never	Very satisfied	Very satisfied	Very satisfied	Very satisfied	Dissatisfied	Satisfied	Satisfied	Satisfied	509930809	a9bee633-995a-4999-8980-579a279492dd	2025-07-03 13:49:07			submitted_via_web		vg72TbC2cYx2XL4zA5ftJK		uuid:a9bee633-995a-4999-8980-579a279492dd	9
25	Female	Single	Tertiary education	Unemployed	Parent		Less than 6 months	Never	Sometimes	Never	Sometimes	Quite often	Sometimes	Sometimes	Never	Neutral	Very satisfied	Dissatisfied	Satisfied	Dissatisfied	Neutral	Satisfied	Very satisfied	509931884	48326312-d6a7-4a5a-ae40-80d95c46776b	2025-07-03 13:50:20			submitted_via_web		vg72TbC2cYx2XL4zA5ftJK		uuid:48326312-d6a7-4a5a-ae40-80d95c46776b	10
62	Male	Married	Secondary education	Self-employed	Spouse	50,000-100,000	More than 3 years	Never	Never	Never	Sometimes	Always	Quite often	Rarely	Never	Very satisfied	Very satisfied	Satisfied	Very satisfied	Dissatisfied	Satisfied	Satisfied	Satisfied	509932734	74c92046-0e1e-4596-b027-98c5a32a69f3	2025-07-03 13:51:09			submitted_via_web		vg72TbC2cYx2XL4zA5ftJK		uuid:74c92046-0e1e-4596-b027-98c5a32a69f3	11
42	Male	Single	Secondary education	Employed (full-time)	Sibling	20,000-50,000	More than 3 years	Sometimes	Sometimes	Never	Sometimes	Sometimes	Always	Always	Never	Dissatisfied	Very satisfied	Dissatisfied	Neutral	Very dissatisfied	Satisfied	Very dissatisfied	Satisfied	509933807	4fb93128-cb48-4e45-a919-a7c98d1f1453	2025-07-03 13:52:12			submitted_via_web		vg72TbC2cYx2XL4zA5ftJK		uuid:4fb93128-cb48-4e45-a919-a7c98d1f1453	12
26	Male	Single	Tertiary education	Self-employed	Sibling	Above 100,000	6 months to 1 year	Sometimes	Sometimes	Never	Always	Sometimes	Always	Quite often	Never	Very satisfied	Very satisfied	Very satisfied	Dissatisfied	Neutral	Very satisfied	Very dissatisfied	Very satisfied	509935163	bfb2d0e3-8f4f-4f76-9f0c-853cf5b62b4b	2025-07-03 13:53:29			submitted_via_web		vg72TbC2cYx2XL4zA5ftJK		uuid:bfb2d0e3-8f4f-4f76-9f0c-853cf5b62b4b	13
72	Female	Married	Primary education	Self-employed	Parent	Below 20,000	More than 3 years	Never	Quite often	Never	Always	Always	Always	Quite often	Never	Dissatisfied	Very satisfied	Dissatisfied	Satisfied	Very dissatisfied	Satisfied	Dissatisfied	Satisfied	509936491	f688f7a3-4031-4f37-a94d-e9fdf2dbcd5e	2025-07-03 13:54:46			submitted_via_web		vg72TbC2cYx2XL4zA5ftJK		uuid:f688f7a3-4031-4f37-a94d-e9fdf2dbcd5e	14
60	Female	Married	Primary education	Self-employed	Parent	Below 20,000	6 months to 1 year	Sometimes	Sometimes	Never	Sometimes	Sometimes	Sometimes	Sometimes	Never	Satisfied	Satisfied	Neutral	Neutral	Dissatisfied	Satisfied	Neutral	Neutral	509937688	75758e07-35c9-4825-829a-ac9e31f81b06	2025-07-03 13:55:42			submitted_via_web		vg72TbC2cYx2XL4zA5ftJK		uuid:75758e07-35c9-4825-829a-ac9e31f81b06	15
61	Female	Divorced/Separated	Primary education	Self-employed	Sibling	20,000-50,000	More than 3 years	Never	Sometimes	Never	Always	Sometimes	Rarely	Never	Always	Dissatisfied	Neutral	Dissatisfied	Very dissatisfied	Dissatisfied	Very dissatisfied	Very dissatisfied	Dissatisfied	509938904	ee8ce0fc-0266-45bb-8457-31549da09b1b	2025-07-03 13:56:46			submitted_via_web		vg72TbC2cYx2XL4zA5ftJK		uuid:ee8ce0fc-0266-45bb-8457-31549da09b1b	16
42	Male	Married	Secondary education	Self-employed	Sibling	Above 100,000	Less than 6 months	Never	Never	Never	Never	Never	Never	Never	Never	Satisfied	Very satisfied	Very satisfied	Neutral	Neutral	Very satisfied	Very satisfied	Very satisfied	509949544	6b47dd58-e935-4526-940a-e0cdac9f834f	2025-07-03 14:08:16			submitted_via_web		vg72TbC2cYx2XL4zA5ftJK		uuid:6b47dd58-e935-4526-940a-e0cdac9f834f	17
28	Female	Married	Secondary education	Self-employed	Sibling	20,000-50,000	More than 3 years	Never	Never	Never	Never	Never	Never	Never	Never	Very satisfied	Very satisfied	Very satisfied	Very satisfied	Neutral	Very satisfied	Very satisfied	Very satisfied	509950320	52f8b08e-0d35-4a4d-97c5-7aeb5ef17143	2025-07-03 14:09:07			submitted_via_web		vg72TbC2cYx2XL4zA5ftJK		uuid:52f8b08e-0d35-4a4d-97c5-7aeb5ef17143	18
25	Female	Single	Tertiary education	Employed (full-time)	Child	Above 100,000		Never	Never	Never	Never	Never	Never	Never	Never	Very satisfied	Very satisfied	Very satisfied	Very satisfied	Very satisfied	Very satisfied	Very satisfied	Very satisfied	509951304	f9d71eae-1cb1-4d75-b175-f465488ae984	2025-07-03 14:10:11			submitted_via_web		vg72TbC2cYx2XL4zA5ftJK		uuid:f9d71eae-1cb1-4d75-b175-f465488ae984	19
65	Female	Widowed	Primary education	Self-employed	Parent	Below 20,000	More than 3 years	Sometimes	Always	Never	Always	Always	Never	Quite often	Never	Neutral	Satisfied	Dissatisfied	Very satisfied	Very dissatisfied	Neutral	Dissatisfied	Very satisfied	509952228	1a97a49b-1996-4d3d-950a-82a99363de4b	2025-07-03 14:11:12			submitted_via_web		vg72TbC2cYx2XL4zA5ftJK		uuid:1a97a49b-1996-4d3d-950a-82a99363de4b	20
	Female	Married	Tertiary education	Unemployed	Sibling	Below 20,000	6 months to 1 year	Quite often	Always	Never	Sometimes	Always	Always	Always	Quite often	Neutral	Neutral	Neutral	Very dissatisfied	Dissatisfied	Neutral	Dissatisfied	Neutral	509952915	dddd82db-326b-4cc6-aced-a3d8ce1cdd09	2025-07-03 14:12:02			submitted_via_web		vg72TbC2cYx2XL4zA5ftJK		uuid:dddd82db-326b-4cc6-aced-a3d8ce1cdd09	21
26	Female	Single	Secondary education	Self-employed	Child	Below 20,000	More than 3 years	Sometimes	Never	Never	Never	Never	Never	Never	Never	Satisfied	Very satisfied	Very satisfied	Very satisfied	Dissatisfied	Very satisfied	Very satisfied	Neutral	509955547	9f1696ec-fb79-46db-adc6-b2984bc9dca3	2025-07-03 14:14:35			submitted_via_web		vg72TbC2cYx2XL4zA5ftJK		uuid:9f1696ec-fb79-46db-adc6-b2984bc9dca3	22
48	Female	Married	Secondary education	Self-employed	Spouse	20,000-50,000	More than 3 years	Sometimes	Sometimes	Never	Never	Always	Sometimes	Always	Never	Neutral	Very satisfied	Dissatisfied	Very satisfied	Very satisfied	Dissatisfied	Dissatisfied	Dissatisfied	509956994	05b4b98e-d868-4697-b033-4b5c7934309a	2025-07-03 14:16:13			submitted_via_web		vg72TbC2cYx2XL4zA5ftJK		uuid:05b4b98e-d868-4697-b033-4b5c7934309a	23
50	Female	Married	Primary education	Self-employed	Sibling	Below 20,000	More than 3 years	Never	Never	Never	Never	Always	Never	Sometimes	Never	Very satisfied	Very satisfied	Neutral	Satisfied	Dissatisfied	Very satisfied	Very satisfied	Very satisfied	509957933	22c8e2c8-a28a-49ea-b02b-5e4b5b8f4c5f	2025-07-03 14:17:13			submitted_via_web		vg72TbC2cYx2XL4zA5ftJK		uuid:22c8e2c8-a28a-49ea-b02b-5e4b5b8f4c5f	24
21	Female	Single	Secondary education	Employed (full-time)	Parent	Below 20,000	More than 3 years	Never	Never	Never	Never	Sometimes	Never	Never	Never	Very satisfied	Very satisfied	Dissatisfied	Very satisfied	Very satisfied	Very satisfied	Very satisfied	Very satisfied	509958829	49e0a574-23e6-4db6-8a45-dab5b92b31e5	2025-07-03 14:18:09			submitted_via_web		vg72TbC2cYx2XL4zA5ftJK		uuid:49e0a574-23e6-4db6-8a45-dab5b92b31e5	25
26	Female	Single	Secondary education	Employed (full-time)	Child	20,000-50,000	6 months to 1 year	Quite often	Sometimes	Always	Quite often	Always	Quite often	Always	Quite often	Neutral	Very satisfied	Neutral	Satisfied	Dissatisfied	Dissatisfied	Neutral	Neutral	509960111	74963081-c052-4294-b85d-86e95f4696c5	2025-07-03 14:20:03			submitted_via_web		vg72TbC2cYx2XL4zA5ftJK		uuid:74963081-c052-4294-b85d-86e95f4696c5	26
	Male	Single	Tertiary education	Self-employed	Sibling	50,000-100,000	Less than 6 months	Never	Never	Never	Never	Never	Never	Never	Never	Satisfied	Very satisfied	Satisfied	Satisfied	Neutral	Satisfied	Dissatisfied	Satisfied	509960620	bb3ed3f2-1133-48dd-8f17-91919d6a8c69	2025-07-03 14:20:49			submitted_via_web		vg72TbC2cYx2XL4zA5ftJK		uuid:bb3ed3f2-1133-48dd-8f17-91919d6a8c69	27
	Female	Single	Tertiary education	Employed (full-time)	Sibling	Above 100,000	Less than 6 months	Never	Never	Never	Sometimes	Sometimes	Always	Never	Never	Very satisfied	Very satisfied	Very satisfied	Very satisfied	Satisfied	Very satisfied	Very satisfied	Very satisfied	509961531	18147f99-569f-4d04-ba75-083bd4821d70	2025-07-03 14:21:48			submitted_via_web		vg72TbC2cYx2XL4zA5ftJK		uuid:18147f99-569f-4d04-ba75-083bd4821d70	28
53	Male	Married	Tertiary education	Self-employed	Sibling	50,000-100,000	More than 3 years	Sometimes	Quite often	Never	Always	Always	Sometimes	Sometimes	Rarely	Very dissatisfied	Satisfied	Satisfied	Satisfied	Dissatisfied	Dissatisfied	Satisfied	Neutral	509962823	0f8c6c1e-280f-4a19-8621-67840a6f26aa	2025-07-03 14:23:18			submitted_via_web		vg72TbC2cYx2XL4zA5ftJK		uuid:0f8c6c1e-280f-4a19-8621-67840a6f26aa	29
17	Female	Single	Secondary education	Unemployed	Sibling	Below 20,000	Less than 6 months	Sometimes	Sometimes	Quite often	Quite often	Sometimes	Sometimes	Quite often	Sometimes	Neutral	Satisfied	Very satisfied	Neutral	Dissatisfied	Neutral	Neutral	Dissatisfied	509963584	80602a12-2617-45d7-8201-229d0b065410	2025-07-03 14:24:20			submitted_via_web		vg72TbC2cYx2XL4zA5ftJK		uuid:80602a12-2617-45d7-8201-229d0b065410	30
49	Female	Widowed	Secondary education	Self-employed	Child	Below 20,000	Less than 6 months	Always	Never	Never	Never	Sometimes	Always	Never	Never	Satisfied	Satisfied	Satisfied	Satisfied	Satisfied	Satisfied	Satisfied	Satisfied	509964522	0130a475-71a8-4012-bd61-212723c0a2b7	2025-07-03 14:25:31			submitted_via_web		vg72TbC2cYx2XL4zA5ftJK		uuid:0130a475-71a8-4012-bd61-212723c0a2b7	31
24	Female	Married	Secondary education	Self-employed		20,000-50,000	Less than 6 months	Never	Always	Never	Never	Never	Never	Sometimes	Never	Neutral	Satisfied	Very satisfied	Very satisfied	Dissatisfied		Satisfied	Very satisfied	509968931	ab7484d0-d97f-4991-9c69-846791211457	2025-07-03 14:31:04			submitted_via_web		vg72TbC2cYx2XL4zA5ftJK		uuid:ab7484d0-d97f-4991-9c69-846791211457	32
	Female	Single	Tertiary education	Self-employed	Child	Above 100,000	Less than 6 months	Never	Never	Sometimes	Sometimes	Sometimes	Never	Never	Never	Very satisfied	Very satisfied	Very satisfied	Satisfied	Neutral	Very satisfied	Satisfied	Satisfied	509972057	6ea9c558-bcea-4bba-a3cf-1c27ef1b274b	2025-07-03 14:34:15			submitted_via_web		vg72TbC2cYx2XL4zA5ftJK		uuid:6ea9c558-bcea-4bba-a3cf-1c27ef1b274b	33
28	Female	Married	Tertiary education	Self-employed	Child		Less than 6 months		Quite often	Quite often	Always	Always	Quite often	Sometimes	Never	Neutral	Neutral	Neutral	Satisfied	Dissatisfied	Neutral	Neutral	Neutral	509973670	e9dc748a-305a-4df6-b602-30706d3798c6	2025-07-03 14:36:04			submitted_via_web		vg72TbC2cYx2XL4zA5ftJK		uuid:e9dc748a-305a-4df6-b602-30706d3798c6	34
20	Female	Single	Tertiary education	Self-employed	Sibling	Below 20,000	6 months to 1 year	Always	Always	Quite often	Always	Sometimes	Sometimes	Sometimes	Sometimes	Satisfied	Very satisfied	Dissatisfied	Neutral	Dissatisfied	Very satisfied	Very satisfied	Dissatisfied	509975008	287d93e8-6973-4141-a501-130a2b0c4f04	2025-07-03 14:37:25			submitted_via_web		vg72TbC2cYx2XL4zA5ftJK		uuid:287d93e8-6973-4141-a501-130a2b0c4f04	35
21	Female	Single	Secondary education	Self-employed	Sibling		Less than 6 months	Always	Always	Never	Always	Always	Sometimes	Sometimes	Sometimes	Very dissatisfied	Satisfied	Satisfied	Satisfied	Very satisfied	Dissatisfied	Satisfied	Satisfied	509975758	8bbc0d81-cec7-43d1-94b2-3c41b0227e12	2025-07-03 14:38:21			submitted_via_web		vg72TbC2cYx2XL4zA5ftJK		uuid:8bbc0d81-cec7-43d1-94b2-3c41b0227e12	36
20	Female	Single	Secondary education	Self-employed	Sibling	Below 20,000	Less than 6 months	Always	Always	Never	Always	Always	Never	Always	Never	Dissatisfied	Very dissatisfied	Very dissatisfied	Very satisfied	Very dissatisfied	Very dissatisfied	Very satisfied	Very satisfied	509976829	df9b2a62-ce5f-4a55-a1fa-f6bdbb862e9a	2025-07-03 14:39:34			submitted_via_web		vg72TbC2cYx2XL4zA5ftJK		uuid:df9b2a62-ce5f-4a55-a1fa-f6bdbb862e9a	37
68	Female	Married	Tertiary education	Unemployed	Child	Above 100,000	More than 3 years	Always	Always	Never	Never	Sometimes	Never	Always	Never	Dissatisfied	Very satisfied	Very satisfied	Very satisfied	Neutral	Neutral	Very satisfied	Neutral	509978088	22970930-3103-4326-8c06-b5c032c1cdb7	2025-07-03 14:40:59			submitted_via_web		vg72TbC2cYx2XL4zA5ftJK		uuid:22970930-3103-4326-8c06-b5c032c1cdb7	38
18	Male	Single	Tertiary education	Self-employed	Sibling	50,000-100,000	Less than 6 months	Never	Rarely	Never	Never	Never	Never	Rarely	Never	Satisfied	Satisfied	Satisfied	Satisfied	Very satisfied	Neutral	Satisfied	Very satisfied	509978855	374297a6-2160-4c05-ae05-174f769bbb10	2025-07-03 14:41:51			submitted_via_web		vg72TbC2cYx2XL4zA5ftJK		uuid:374297a6-2160-4c05-ae05-174f769bbb10	39
	Female	Married	Primary education	Self-employed	Child	Below 20,000	6 months to 1 year	Always	Always	Sometimes	Always	Always	Sometimes	Always	Never	Very satisfied	Very satisfied	Satisfied	Satisfied	Dissatisfied	Neutral	Satisfied	Dissatisfied	509979972	2dfd5431-cb8f-4dcc-b1db-c68508c4229e	2025-07-03 14:42:57			submitted_via_web		vg72TbC2cYx2XL4zA5ftJK		uuid:2dfd5431-cb8f-4dcc-b1db-c68508c4229e	40
61	Female	Widowed	Primary education	Self-employed	Child	20,000-50,000	Less than 6 months	Never	Never	Never	Never	Never	Always	Rarely	Never	Very satisfied	Very satisfied	Very satisfied	Satisfied	Satisfied	Satisfied	Satisfied	Satisfied	509989210	a66de367-a73a-4440-aafb-0e7d1f959b3e	2025-07-03 14:52:21			submitted_via_web		vg72TbC2cYx2XL4zA5ftJK		uuid:a66de367-a73a-4440-aafb-0e7d1f959b3e	41
35	Female	Married	Secondary education	Unemployed	Sibling	Below 20,000	Less than 6 months	Never	Always	Never	Always	Always	Sometimes	Always	Never	Dissatisfied	Very satisfied	Dissatisfied	Very satisfied	Dissatisfied	Satisfied	Satisfied	Dissatisfied	509990011	07a2f686-f20d-46b5-813d-ad4a2c401a09	2025-07-03 14:53:21			submitted_via_web		vg72TbC2cYx2XL4zA5ftJK		uuid:07a2f686-f20d-46b5-813d-ad4a2c401a09	42
	Female	Single	Tertiary education	Employed (full-time)	Sibling	50,000-100,000	Less than 6 months	Always	Quite often	Never	Always	Always	Sometimes	Quite often	Sometimes	Very satisfied	Very satisfied	Dissatisfied	Satisfied	Very dissatisfied	Satisfied	Very satisfied	Satisfied	509990953	017119b4-f4df-41be-b749-a5854e5eecf5	2025-07-03 14:54:23			submitted_via_web		vg72TbC2cYx2XL4zA5ftJK		uuid:017119b4-f4df-41be-b749-a5854e5eecf5	43
65	Female	Widowed	Primary education	Self-employed	Sibling	20,000-50,000	Less than 6 months	Always	Always	Rarely	Always	Always	Sometimes	Always	Never	Satisfied	Satisfied	Neutral	Neutral	Very dissatisfied	Neutral	Satisfied	Neutral	509992260	2121302d-d984-4c8c-8c90-ea070af62226	2025-07-03 14:55:57			submitted_via_web		vg72TbC2cYx2XL4zA5ftJK		uuid:2121302d-d984-4c8c-8c90-ea070af62226	44
	Male	Single	Tertiary education	Unemployed	Parent	Below 20,000	Less than 6 months	Sometimes	Sometimes	Never	Never	Always	Never	Sometimes	Never	Dissatisfied	Very satisfied	Satisfied	Satisfied	Very dissatisfied	Dissatisfied	Satisfied	Satisfied	509993179	d4ff3ddf-8b93-495a-982d-cf9a645b3f79	2025-07-03 14:56:56			submitted_via_web		vg72TbC2cYx2XL4zA5ftJK		uuid:d4ff3ddf-8b93-495a-982d-cf9a645b3f79	45
43	Male	Married	Secondary education	Self-employed	Sibling	20,000-50,000	Less than 6 months	Quite often	Always	Never	Always	Always	Always	Sometimes	Never	Very satisfied	Very satisfied	Very satisfied	Very satisfied	Very satisfied	Very satisfied	Very satisfied	Very satisfied	509994036	3d225e70-0f59-4c99-975f-00bfce551ca4	2025-07-03 14:58:01			submitted_via_web		vg72TbC2cYx2XL4zA5ftJK		uuid:3d225e70-0f59-4c99-975f-00bfce551ca4	46
23	Female	Single	Secondary education	Employed (part-time)	Sibling	Below 20,000	Less than 6 months	Sometimes	Sometimes	Never	Sometimes	Sometimes	Rarely	Sometimes	Rarely	Very dissatisfied	Dissatisfied	Very dissatisfied	Very dissatisfied	Dissatisfied	Neutral	Satisfied	Very satisfied	509994780	e4ed097e-ff69-4695-8cd3-5d573b051d35	2025-07-03 14:58:54			submitted_via_web		vg72TbC2cYx2XL4zA5ftJK		uuid:e4ed097e-ff69-4695-8cd3-5d573b051d35	47
33	Female	Widowed	Primary education	Self-employed	Sibling	20,000-50,000	Less than 6 months	Sometimes	Sometimes	Never	Always	Quite often	Always	Always	Never	Very satisfied	Very satisfied	Very satisfied	Satisfied		Very dissatisfied	Satisfied	Satisfied	509995562	d5a0ae39-e541-47dc-bfa0-fd6d63da8a99	2025-07-03 14:59:48			submitted_via_web		vg72TbC2cYx2XL4zA5ftJK		uuid:d5a0ae39-e541-47dc-bfa0-fd6d63da8a99	48
60	Female	Widowed	Primary education	Self-employed	Parent		Less than 6 months	Sometimes	Always	Sometimes	Always	Always	Never	Always	Never	Very satisfied	Very satisfied	Dissatisfied	Neutral	Dissatisfied	Neutral	Dissatisfied	Very satisfied	509996452	c63ab0ae-d99d-41a1-9374-b6f2f878b114	2025-07-03 15:00:49			submitted_via_web		vg72TbC2cYx2XL4zA5ftJK		uuid:c63ab0ae-d99d-41a1-9374-b6f2f878b114	49
17	Male	Single	Secondary education	Self-employed	Parent	20,000-50,000	Less than 6 months	Sometimes	Never	Never	Rarely	Rarely	Rarely	Rarely	Never	Satisfied	Satisfied	Satisfied	Very satisfied	Neutral	Very satisfied	Satisfied	Satisfied	509997459	b11584ca-1d11-4e1c-a359-b879931114d0	2025-07-03 15:01:52			submitted_via_web		vg72TbC2cYx2XL4zA5ftJK		uuid:b11584ca-1d11-4e1c-a359-b879931114d0	50
50	Female	Married	Primary education	Self-employed	Parent	50,000-100,000	Less than 6 months	Sometimes	Always	Never	Always	Always	Never	Always	Never	Dissatisfied	Satisfied	Dissatisfied	Very satisfied	Satisfied	Satisfied	Satisfied	Satisfied	510001152	04959839-7838-486e-987c-8f281b04838e	2025-07-03 15:05:20			submitted_via_web		vg72TbC2cYx2XL4zA5ftJK		uuid:04959839-7838-486e-987c-8f281b04838e	51
50	Female	Widowed	No formal education	Self-employed	Parent	Below 20,000	Less than 6 months	Sometimes	Always	Never	Sometimes	Always	Always	Sometimes	Never	Dissatisfied	Satisfied	Dissatisfied	Neutral	Dissatisfied		Dissatisfied	Neutral	510003297	5f8ecdd3-eb83-4e33-949c-2d2df5498ea5	2025-07-03 15:07:13			submitted_via_web		vg72TbC2cYx2XL4zA5ftJK		uuid:5f8ecdd3-eb83-4e33-949c-2d2df5498ea5	52
47	Female	Married	Secondary education	Self-employed	Parent	20,000-50,000	Less than 6 months	Never	Never	Never	Never	Always	Never	Always	Never	Very satisfied	Very dissatisfied	Satisfied	Satisfied	Very dissatisfied	Satisfied	Dissatisfied	Satisfied	510004097	dcbe6b32-1972-41bb-9f0f-3443e6b30a96	2025-07-03 15:08:03			submitted_via_web		vg72TbC2cYx2XL4zA5ftJK		uuid:dcbe6b32-1972-41bb-9f0f-3443e6b30a96	53
22	Female	Single	Secondary education	Self-employed	Sibling	Below 20,000	Less than 6 months	Sometimes	Sometimes	Never	Always	Always	Sometimes	Sometimes	Never	Satisfied	Very satisfied	Dissatisfied	Very satisfied	Very dissatisfied	Satisfied	Neutral	Neutral	510005097	0a018e75-7f31-48ed-bcd9-c74b6d41cdb4	2025-07-03 15:09:08			submitted_via_web		vg72TbC2cYx2XL4zA5ftJK		uuid:0a018e75-7f31-48ed-bcd9-c74b6d41cdb4	54
40	Female	Single	Primary education	Self-employed	Sibling	20,000-50,000	Less than 6 months	Always	Always	Never	Always	Always	Always	Always	Never	Very satisfied	Very satisfied	Dissatisfied	Satisfied	Dissatisfied	Satisfied	Neutral	Satisfied	510005961	10979aea-0023-4695-8bd1-50b7af91173c	2025-07-03 15:10:05			submitted_via_web		vg72TbC2cYx2XL4zA5ftJK		uuid:10979aea-0023-4695-8bd1-50b7af91173c	55
58	Male	Married	Primary education	Employed (full-time)	Parent	20,000-50,000	Less than 6 months	Never	Always	Never	Always	Always	Never	Always	Never	Very satisfied	Very satisfied	Dissatisfied	Satisfied	Satisfied	Satisfied	Satisfied	Satisfied	510006984	dd19a15b-fc5f-4284-971a-538152491d49	2025-07-03 15:11:07			submitted_via_web		vg72TbC2cYx2XL4zA5ftJK		uuid:dd19a15b-fc5f-4284-971a-538152491d49	56
39	Female	Married	Secondary education	Employed (full-time)	Sibling	20,000-50,000	Less than 6 months	Never	Always	Never	Sometimes	Always	Never	Rarely	Never	Very satisfied	Very satisfied	Satisfied	Satisfied	Neutral	Dissatisfied	Very satisfied	Very satisfied	510008193	40f944f3-141e-4141-9029-d8b5000ba668	2025-07-03 15:12:23			submitted_via_web		vg72TbC2cYx2XL4zA5ftJK		uuid:40f944f3-141e-4141-9029-d8b5000ba668	57
44	Female	Married	Tertiary education	Self-employed	Spouse	Above 100,000	Less than 6 months	Sometimes	Always	Never	Never	Always	Never	Sometimes	Never	Satisfied	Satisfied	Satisfied	Satisfied	Dissatisfied	Satisfied	Very satisfied	Satisfied	510008995	26fc9169-2696-4965-94a5-ea315873abbc	2025-07-03 15:13:15			submitted_via_web		vg72TbC2cYx2XL4zA5ftJK		uuid:26fc9169-2696-4965-94a5-ea315873abbc	58
33	Male	Single	Tertiary education	Employed (full-time)	Sibling	Above 100,000	Less than 6 months	Always	Always	Never	Always	Always	Always	Sometimes	Sometimes	Neutral	Very satisfied	Dissatisfied	Satisfied	Very dissatisfied	Dissatisfied	Very dissatisfied	Very dissatisfied	510009783	63425ddc-faa1-4e1d-8b35-f69c0b1dfde4	2025-07-03 15:14:11			submitted_via_web		vg72TbC2cYx2XL4zA5ftJK		uuid:63425ddc-faa1-4e1d-8b35-f69c0b1dfde4	59
38	Female	Married	Secondary education	Employed (full-time)	Sibling	50,000-100,000	More than 3 years	Never	Sometimes	Never	Always	Always	Never	Quite often	Never	Very satisfied	Very satisfied	Very satisfied	Satisfied	Dissatisfied	Satisfied	Dissatisfied	Very satisfied	510016683	8704c229-4688-47e3-b055-3577a09d72cc	2025-07-03 15:21:41			submitted_via_web		vg72TbC2cYx2XL4zA5ftJK		uuid:8704c229-4688-47e3-b055-3577a09d72cc	60
52	Male	Married	Primary education	Self-employed	Sibling	50,000-100,000	Less than 6 months	Sometimes	Always	Never	Always	Always	Never	Sometimes	Never	Dissatisfied	Very satisfied	Very dissatisfied	Satisfied	Dissatisfied	Satisfied	Satisfied	Satisfied	510017641	7b43be92-ec21-44c7-9860-a5c45f347e1c	2025-07-03 15:22:54			submitted_via_web		vg72TbC2cYx2XL4zA5ftJK		uuid:7b43be92-ec21-44c7-9860-a5c45f347e1c	61
51	Male	Married	Secondary education	Self-employed	Sibling	50,000-100,000	Less than 6 months	Sometimes	Always	Never	Always	Always	Never	Always	Never	Satisfied	Satisfied	Satisfied	Very dissatisfied	Very satisfied	Satisfied	Satisfied	Satisfied	510018400	e2720818-5ae0-4e8d-aeea-1dfc16da313f	2025-07-03 15:23:51			submitted_via_web		vg72TbC2cYx2XL4zA5ftJK		uuid:e2720818-5ae0-4e8d-aeea-1dfc16da313f	62
51	Male	Married	Secondary education	Self-employed	Sibling	Above 100,000	Less than 6 months																	510019003	299b7196-703e-48b6-8fdc-3c7ee0c1145c	2025-07-03 15:24:38			submitted_via_web		vg72TbC2cYx2XL4zA5ftJK		uuid:299b7196-703e-48b6-8fdc-3c7ee0c1145c	63
20	Male	Single	Secondary education	Unemployed	Child	Below 20,000	Less than 6 months	Never	Never	Never	Never	Never	Never	Sometimes	Never	Very satisfied	Very satisfied	Satisfied	Satisfied	Very dissatisfied	Satisfied	Very satisfied	Very satisfied	510021785	05608cdd-f787-4ad6-9ffd-574b5fb3ff38	2025-07-03 15:27:42			submitted_via_web		vg72TbC2cYx2XL4zA5ftJK		uuid:05608cdd-f787-4ad6-9ffd-574b5fb3ff38	64
40	Female	Married	Tertiary education	Employed (full-time)	Sibling	Above 100,000	More than 3 years	Never	Sometimes	Never	Sometimes	Always	Never	Always	Never	Very satisfied	Very satisfied	Very satisfied	Satisfied	Satisfied	Satisfied	Satisfied	Satisfied	510022469	c11fc696-3e73-4817-ad75-0e6ea95002ee	2025-07-03 15:28:35			submitted_via_web		vg72TbC2cYx2XL4zA5ftJK		uuid:c11fc696-3e73-4817-ad75-0e6ea95002ee	65
32	Male	Married	Secondary education		Sibling	20,000-50,000	Less than 6 months																	510022973	0c55d4a3-eea3-4b37-9d69-1f24d9d27d91	2025-07-03 15:29:05			submitted_via_web		vg72TbC2cYx2XL4zA5ftJK		uuid:0c55d4a3-eea3-4b37-9d69-1f24d9d27d91	66
24	Male	Single	Tertiary education	Self-employed	Parent	20,000-50,000	More than 3 years	Never	Sometimes	Never	Never	Never	Never	Never	Never	Satisfied	Satisfied	Satisfied	Neutral	Neutral	Neutral	Dissatisfied	Satisfied	510027169	ebd7029a-1f9b-424a-a75e-dde695deb9f2	2025-07-03 15:34:02			submitted_via_web		vg72TbC2cYx2XL4zA5ftJK		uuid:ebd7029a-1f9b-424a-a75e-dde695deb9f2	67
60	Female	Widowed	Primary education	Self-employed	Parent	20,000-50,000	1-3 years	Never	Sometimes	Never	Sometimes	Always	Never	Always	Never	Dissatisfied	Very satisfied	Dissatisfied	Very satisfied	Very dissatisfied	Satisfied	Satisfied	Very satisfied	510028177	35845efc-0297-4503-9d69-a9d528a67a4e	2025-07-03 15:35:00			submitted_via_web		vg72TbC2cYx2XL4zA5ftJK		uuid:35845efc-0297-4503-9d69-a9d528a67a4e	68
33	Female	Married	Tertiary education	Employed (full-time)	Child	50,000-100,000	More than 3 years	Never	Sometimes	Never	Never	Never	Never	Never	Never	Very satisfied	Very satisfied	Very satisfied	Very satisfied	Very dissatisfied	Very satisfied	Very satisfied	Very satisfied	510028797	1f21b3ce-80f2-4807-a4bd-2480ab360734	2025-07-03 15:35:47			submitted_via_web		vg72TbC2cYx2XL4zA5ftJK		uuid:1f21b3ce-80f2-4807-a4bd-2480ab360734	69
39	Female	Married	Tertiary education	Self-employed	Sibling	50,000-100,000	More than 3 years	Never	Never	Never	Never	Never	Never	Never	Never	Very satisfied	Very satisfied	Very satisfied	Very satisfied	Very dissatisfied	Very satisfied	Very satisfied	Very satisfied	510029349	da9e718d-3bb4-4b68-bd88-6d0ef84030f7	2025-07-03 15:36:34			submitted_via_web		vg72TbC2cYx2XL4zA5ftJK		uuid:da9e718d-3bb4-4b68-bd88-6d0ef84030f7	70
28	Female	Married	Tertiary education	Self-employed	Sibling	20,000-50,000	More than 3 years	Sometimes	Sometimes	Never	Never	Never	Always	Always	Never	Satisfied	Very satisfied	Dissatisfied	Very satisfied	Very dissatisfied	Neutral	Dissatisfied	Very satisfied	510030391	1ad00a59-213b-415e-8db9-81bbc6e7fc2d	2025-07-03 15:37:31			submitted_via_web		vg72TbC2cYx2XL4zA5ftJK		uuid:1ad00a59-213b-415e-8db9-81bbc6e7fc2d	71
40	Female	Married	Secondary education	Self-employed	Parent	Below 20,000	1-3 years	Never	Never	Never	Never	Sometimes	Never	Never	Never	Very satisfied	Very satisfied	Very satisfied	Very satisfied	Very dissatisfied	Very satisfied	Very satisfied	Very satisfied	510031283	2ad2a406-9540-4095-b6e6-87ac8670bce6	2025-07-03 15:38:34			submitted_via_web		vg72TbC2cYx2XL4zA5ftJK		uuid:2ad2a406-9540-4095-b6e6-87ac8670bce6	72
	Female	Married	Tertiary education	Employed (full-time)	Parent	Above 100,000	More than 3 years	Sometimes	Never	Never	Sometimes	Sometimes	Sometimes	Sometimes	Sometimes	Neutral	Neutral	Dissatisfied	Neutral	Neutral	Neutral	Neutral	Neutral	510032037	800b8be9-91fd-461a-bb14-6c608383bc56	2025-07-03 15:39:24			submitted_via_web		vg72TbC2cYx2XL4zA5ftJK		uuid:800b8be9-91fd-461a-bb14-6c608383bc56	73
24	Female	Married	Secondary education	Self-employed	Sibling	Below 20,000	Less than 6 months	Never	Never	Never	Always	Always	Always	Never	Never	Very satisfied	Very satisfied	Very satisfied	Very satisfied	Satisfied	Very satisfied	Dissatisfied	Very satisfied	510033195	264b9bcc-1c88-4e9f-86be-f8b04e699833	2025-07-03 15:40:35			submitted_via_web		vg72TbC2cYx2XL4zA5ftJK		uuid:264b9bcc-1c88-4e9f-86be-f8b04e699833	74
52	Male	Married	Secondary education	Self-employed	Sibling	20,000-50,000	1-3 years	Sometimes	Never	Never	Never	Never	Never	Never	Never	Neutral	Satisfied	Satisfied	Satisfied	Dissatisfied	Satisfied	Satisfied	Satisfied	510034241	54686273-3168-4550-973d-8ebc81fbdf92	2025-07-03 15:41:34			submitted_via_web		vg72TbC2cYx2XL4zA5ftJK		uuid:54686273-3168-4550-973d-8ebc81fbdf92	75
57	Female	Married	Tertiary education	Employed (full-time)	Sibling	Above 100,000	More than 3 years	Never	Sometimes	Never	Sometimes	Quite often	Never	Sometimes	Never	Very satisfied	Very satisfied	Very satisfied	Very satisfied	Neutral	Neutral	Neutral	Neutral	510035967	cd861cc1-42fd-462c-b686-882673b10bca	2025-07-03 15:43:25			submitted_via_web		vg72TbC2cYx2XL4zA5ftJK		uuid:cd861cc1-42fd-462c-b686-882673b10bca	76
20	Male	Single	Tertiary education	Unemployed	Child	Below 20,000	More than 3 years	Never	Never	Never	Never	Never	Quite often	Always	Never	Very satisfied	Very satisfied	Neutral	Dissatisfied	Very dissatisfied	Dissatisfied	Satisfied	Very satisfied	510037341	e34420e9-7b51-4005-8de8-a5eb188395af	2025-07-03 15:44:31			submitted_via_web		vg72TbC2cYx2XL4zA5ftJK		uuid:e34420e9-7b51-4005-8de8-a5eb188395af	77
28	Male	Single	Secondary education	Self-employed	Sibling	Above 100,000	Less than 6 months	Never	Sometimes	Never	Always	Rarely	Never	Never	Never	Very dissatisfied	Dissatisfied	Satisfied	Very dissatisfied	Satisfied	Satisfied	Satisfied	Satisfied	510038397	ef92f467-0841-47fb-a0e2-03cb2a61a72d	2025-07-03 15:45:36			submitted_via_web		vg72TbC2cYx2XL4zA5ftJK		uuid:ef92f467-0841-47fb-a0e2-03cb2a61a72d	78
42	Male	Married	Tertiary education	Self-employed	Sibling	50,000-100,000	More than 3 years	Never	Sometimes	Never	Sometimes	Sometimes	Never	Never	Never	Very satisfied	Very satisfied	Very satisfied	Very satisfied	Satisfied	Satisfied	Satisfied	Very satisfied	510039323	6477e1a0-dc4c-48e4-871a-ac9c7ea18b72	2025-07-03 15:46:27			submitted_via_web		vg72TbC2cYx2XL4zA5ftJK		uuid:6477e1a0-dc4c-48e4-871a-ac9c7ea18b72	79
26	Male	Single	No formal education	Self-employed	Parent	Below 20,000	Less than 6 months	Never	Never	Never	Never	Always	Always	Always	Never	Dissatisfied	Very satisfied	Dissatisfied	Very dissatisfied	Very dissatisfied	Very satisfied	Very satisfied	Very satisfied	510040405	9c10c8be-7efb-45bf-aad5-475a2f799abe	2025-07-03 15:47:33			submitted_via_web		vg72TbC2cYx2XL4zA5ftJK		uuid:9c10c8be-7efb-45bf-aad5-475a2f799abe	80
45	Male	Single	Tertiary education	Employed (full-time)	Sibling	20,000-50,000	Less than 6 months	Always	Always	Never	Quite often	Always	Never	Always	Never	Dissatisfied	Dissatisfied	Dissatisfied	Very satisfied	Very dissatisfied	Dissatisfied	Dissatisfied	Very dissatisfied	510041441	d5099dfa-8d23-4dba-a724-654f5c44e722	2025-07-03 15:48:39			submitted_via_web		vg72TbC2cYx2XL4zA5ftJK		uuid:d5099dfa-8d23-4dba-a724-654f5c44e722	81
	Female	Single	Secondary education	Self-employed		20,000-50,000	1-3 years	Never	Never	Never	Never	Sometimes	Sometimes	Never	Never	Very dissatisfied	Satisfied	Satisfied	Satisfied	Dissatisfied	Satisfied	Satisfied	Satisfied	510042500	46819934-fb50-486a-9d4e-6912a1c66aa3	2025-07-03 15:49:58			submitted_via_web		vg72TbC2cYx2XL4zA5ftJK		uuid:46819934-fb50-486a-9d4e-6912a1c66aa3	82
48	Female	Divorced/Separated	Tertiary education	Self-employed	Parent	Above 100,000	6 months to 1 year	Never	Never	Never	Never	Never	Never	Never	Never	Satisfied	Satisfied	Satisfied	Satisfied	Satisfied	Satisfied	Satisfied	Satisfied	510043761	e989d37b-4d73-400e-b5e1-900c8e4210b0	2025-07-03 15:51:18			submitted_via_web		vg72TbC2cYx2XL4zA5ftJK		uuid:e989d37b-4d73-400e-b5e1-900c8e4210b0	83
22	Male	Single	Secondary education	Self-employed	Sibling	20,000-50,000	More than 3 years	Never	Sometimes	Never	Never	Sometimes	Sometimes	Never	Never	Satisfied	Satisfied	Very dissatisfied	Satisfied	Very dissatisfied	Neutral	Neutral	Satisfied	510044545	4840a14b-1c7b-4f3f-a191-3e60f6b1deb4	2025-07-03 15:52:14			submitted_via_web		vg72TbC2cYx2XL4zA5ftJK		uuid:4840a14b-1c7b-4f3f-a191-3e60f6b1deb4	84
	Female	Single	Tertiary education	Employed (part-time)	Child	50,000-100,000	Less than 6 months	Never	Always	Never	Never	Never	Never	Never	Rarely	Very satisfied	Very satisfied	Neutral	Very satisfied	Neutral	Dissatisfied	Dissatisfied	Very satisfied	510045938	22b04682-f936-499f-a164-20eac1135ae5	2025-07-03 15:53:40			submitted_via_web		vg72TbC2cYx2XL4zA5ftJK		uuid:22b04682-f936-499f-a164-20eac1135ae5	85
32	Female	Single	Tertiary education	Employed (full-time)	Sibling	Above 100,000	More than 3 years	Never	Never	Never	Sometimes	Sometimes	Never	Never	Never	Very satisfied	Very satisfied	Very satisfied	Very satisfied	Satisfied	Very satisfied	Satisfied	Satisfied	510046926	08c88a87-ed87-4449-be5b-ebeb12c1c46d	2025-07-03 15:54:33			submitted_via_web		vg72TbC2cYx2XL4zA5ftJK		uuid:08c88a87-ed87-4449-be5b-ebeb12c1c46d	86
51	Male	Married	Primary education	Self-employed	Parent	Above 100,000	1-3 years	Never	Never	Never	Never	Rarely	Sometimes	Never	Quite often	Satisfied	Very satisfied	Satisfied	Satisfied	Satisfied	Very satisfied	Very satisfied	Satisfied	510048128	83d3e370-52c5-49ed-846f-eed36c93f123	2025-07-03 15:55:47			submitted_via_web		vg72TbC2cYx2XL4zA5ftJK		uuid:83d3e370-52c5-49ed-846f-eed36c93f123	87
55	Male	Married	Secondary education	Self-employed	Spouse	50,000-100,000	6 months to 1 year	Never	Never	Never	Sometimes	Never	Never	Never	Never	Very satisfied	Very satisfied	Very satisfied	Very satisfied	Dissatisfied	Very satisfied	Very satisfied	Very satisfied	510049029	c76b4bba-cd90-479d-afdd-fa66d75032ff	2025-07-03 15:56:37			submitted_via_web		vg72TbC2cYx2XL4zA5ftJK		uuid:c76b4bba-cd90-479d-afdd-fa66d75032ff	88
35	Male	Married	Primary education	Self-employed	Sibling	50,000-100,000	More than 3 years	Never	Never	Never	Never	Sometimes	Always	Never	Never	Very satisfied	Very satisfied	Very satisfied	Very satisfied	Very dissatisfied	Very satisfied	Neutral	Satisfied	510049859	5bcaf716-5cc9-4ce8-b9f3-2a3c10c5a3e6	2025-07-03 15:57:29			submitted_via_web		vg72TbC2cYx2XL4zA5ftJK		uuid:5bcaf716-5cc9-4ce8-b9f3-2a3c10c5a3e6	89
48	Male	Married	Tertiary education	Self-employed	Parent	50,000-100,000	More than 3 years	Never	Sometimes	Never	Sometimes	Always	Always	Sometimes	Never	Very satisfied	Very satisfied	Neutral	Very satisfied	Very dissatisfied	Very satisfied	Satisfied	Neutral	510050590	0ffb18a8-8695-4d1e-98d7-91eb7cd59780	2025-07-03 15:58:25			submitted_via_web		vg72TbC2cYx2XL4zA5ftJK		uuid:0ffb18a8-8695-4d1e-98d7-91eb7cd59780	90
39	Male	Married	Primary education	Self-employed	Sibling	50,000-100,000	More than 3 years	Never	Always	Never	Sometimes	Always	Never	Always	Never	Neutral	Very satisfied	Neutral	Neutral	Very dissatisfied	Very satisfied	Very satisfied	Very satisfied	510051432	eddd9fc7-23cc-4c64-be35-5ac3d638caab	2025-07-03 15:59:33			submitted_via_web		vg72TbC2cYx2XL4zA5ftJK		uuid:eddd9fc7-23cc-4c64-be35-5ac3d638caab	91
47	Male	Married	Tertiary education	Employed (full-time)	Sibling	Above 100,000	More than 3 years	Sometimes	Sometimes	Never	Always	Always	Always	Sometimes	Never	Very satisfied	Very satisfied	Satisfied	Very satisfied	Very dissatisfied	Very satisfied	Very satisfied	Very satisfied	510054222	127e1db8-57c2-40a3-b321-ab6189fe25bb	2025-07-03 16:02:51			submitted_via_web		vg72TbC2cYx2XL4zA5ftJK		uuid:127e1db8-57c2-40a3-b321-ab6189fe25bb	92
54	Female	Married	Tertiary education	Employed (full-time)	Child	Above 100,000	More than 3 years	Never	Sometimes	Never	Quite often	Sometimes	Never	Never	Never	Neutral	Very satisfied	Very satisfied	Very satisfied	Very dissatisfied	Very satisfied	Neutral	Very satisfied	510055297	2727ec3a-9eab-445b-91bb-4de57b26c720	2025-07-03 16:03:44			submitted_via_web		vg72TbC2cYx2XL4zA5ftJK		uuid:2727ec3a-9eab-445b-91bb-4de57b26c720	93
37	Female	Single	Tertiary education	Self-employed	Child	20,000-50,000	More than 3 years	Sometimes	Sometimes	Sometimes	Sometimes	Rarely	Quite often	Sometimes	Never	Very satisfied	Neutral	Neutral	Neutral	Neutral	Neutral	Very satisfied	Neutral	510056413	fbeb434b-c660-4492-898b-c5df74c145dd	2025-07-03 16:04:44			submitted_via_web		vg72TbC2cYx2XL4zA5ftJK		uuid:fbeb434b-c660-4492-898b-c5df74c145dd	94
32	Male	Married	Tertiary education	Self-employed	Sibling	50,000-100,000	More than 3 years	Never	Always	Never	Always	Sometimes	Never	Quite often	Never	Very satisfied	Very satisfied	Very satisfied	Very satisfied	Very dissatisfied	Satisfied	Satisfied	Very satisfied	510057193	10363346-aa5a-48ec-99d2-0fe6d7e8bbf9	2025-07-03 16:05:37			submitted_via_web		vg72TbC2cYx2XL4zA5ftJK		uuid:10363346-aa5a-48ec-99d2-0fe6d7e8bbf9	95
20	Male	Single	Tertiary education	Self-employed	Parent	50,000-100,000	More than 3 years	Sometimes	Rarely	Never	Sometimes	Sometimes	Rarely	Never	Sometimes	Neutral	Satisfied	Dissatisfied	Dissatisfied	Dissatisfied	Neutral	Dissatisfied	Satisfied	510058510	ca5c9996-1f66-4117-a9cd-f5e00912ffe0	2025-07-03 16:07:16			submitted_via_web		vg72TbC2cYx2XL4zA5ftJK		uuid:ca5c9996-1f66-4117-a9cd-f5e00912ffe0	96
	Male	Single	Tertiary education	Employed (full-time)	Parent	Above 100,000	More than 3 years	Never	Sometimes	Never	Sometimes	Sometimes	Sometimes	Sometimes	Never	Very satisfied	Very satisfied	Satisfied	Very satisfied	Very satisfied	Neutral	Satisfied	Very satisfied	510059014	90fbcc5e-75f6-480c-90f4-9b55ba3ddd25	2025-07-03 16:08:08			submitted_via_web		vg72TbC2cYx2XL4zA5ftJK		uuid:90fbcc5e-75f6-480c-90f4-9b55ba3ddd25	97
18	Female	Single	Secondary education	Unemployed	Child	Below 20,000	More than 3 years	Never	Never	Never	Never	Never	Never	Never	Never	Very satisfied	Very satisfied	Very satisfied	Very satisfied	Very dissatisfied	Very satisfied	Very satisfied	Very satisfied	510059797	bd863b9c-220c-4639-a944-bbfdfdb33717	2025-07-03 16:08:59			submitted_via_web		vg72TbC2cYx2XL4zA5ftJK		uuid:bd863b9c-220c-4639-a944-bbfdfdb33717	98
45	Male	Married	Tertiary education	Self-employed	Child	50,000-100,000	1-3 years	Never	Sometimes	Never	Always	Quite often	Sometimes	Always	Never	Neutral	Very satisfied	Neutral	Very satisfied	Very dissatisfied	Very satisfied	Very dissatisfied	Dissatisfied	510060562	f2ed9333-5ddd-4b37-9c2f-e269e0f16ca0	2025-07-03 16:09:54			submitted_via_web		vg72TbC2cYx2XL4zA5ftJK		uuid:f2ed9333-5ddd-4b37-9c2f-e269e0f16ca0	99
25	Male	Single	Tertiary education	Self-employed	Parent	50,000-100,000	More than 3 years	Never	Sometimes	Never	Never	Never	Never	Sometimes	Never	Neutral	Very satisfied	Neutral	Neutral	Very dissatisfied	Very satisfied	Neutral	Very satisfied	510061512	67f273c1-5da8-4ba5-b199-1aad01fa8494	2025-07-03 16:10:52			submitted_via_web		vg72TbC2cYx2XL4zA5ftJK		uuid:67f273c1-5da8-4ba5-b199-1aad01fa8494	100
17	Male	Single	Secondary education	Unemployed	Child	Below 20,000	Less than 6 months	Sometimes	Sometimes	Never	Never	Never	Never	Never	Never	Very satisfied	Very satisfied	Very satisfied	Very satisfied	Very satisfied	Very satisfied	Very satisfied	Very satisfied	510062127	db141051-a6f0-4c86-b3ce-c3286ae81c01	2025-07-03 16:11:45			submitted_via_web		vg72TbC2cYx2XL4zA5ftJK		uuid:db141051-a6f0-4c86-b3ce-c3286ae81c01	101
50	Male	Married	Secondary education	Self-employed	Spouse	50,000-100,000	6 months to 1 year	Never	Sometimes	Never	Sometimes	Always	Always	Never	Never	Very satisfied	Very satisfied	Very satisfied	Very satisfied	Dissatisfied	Very satisfied	Very dissatisfied	Very satisfied	510062697	9b693974-15cc-46a6-b306-e3ebec655227	2025-07-03 16:12:45			submitted_via_web		vg72TbC2cYx2XL4zA5ftJK		uuid:9b693974-15cc-46a6-b306-e3ebec655227	102
21	Male	Single	Tertiary education	Unemployed	Parent	Below 20,000	More than 3 years	Never	Rarely	Never	Rarely	Never	Never	Never	Never	Very satisfied	Very satisfied	Very satisfied	Very satisfied	Very dissatisfied	Very satisfied	Dissatisfied	Very satisfied	510063244	2a51418a-1c42-49e0-b2ed-f3e238d18f32	2025-07-03 16:13:39			submitted_via_web		vg72TbC2cYx2XL4zA5ftJK		uuid:2a51418a-1c42-49e0-b2ed-f3e238d18f32	103
74	Male	Married	Primary education	Self-employed	Parent	Below 20,000	More than 3 years	Never	Never	Never	Never	Never	Never	Never	Never	Very satisfied	Very satisfied	Very satisfied	Very satisfied	Satisfied	Very satisfied	Very satisfied	Very satisfied	510063687	d9a2207a-f6aa-4dd9-bf0c-d404887abe43	2025-07-03 16:14:27			submitted_via_web		vg72TbC2cYx2XL4zA5ftJK		uuid:d9a2207a-f6aa-4dd9-bf0c-d404887abe43	104
42	Male	Married	Tertiary education	Self-employed	Sibling	Above 100,000	1-3 years	Never	Sometimes	Never	Rarely	Never	Never	Sometimes	Never	Very satisfied	Satisfied	Very satisfied	Satisfied	Very satisfied	Satisfied	Satisfied	Satisfied	510064218	b5a15e82-60a6-4146-99bd-1e0b4d542c6d	2025-07-03 16:15:22			submitted_via_web		vg72TbC2cYx2XL4zA5ftJK		uuid:b5a15e82-60a6-4146-99bd-1e0b4d542c6d	105
32	Male	Married	Secondary education	Unemployed	Sibling		More than 3 years	Never	Never	Never	Sometimes	Never	Never	Never	Never	Satisfied	Very satisfied	Very satisfied	Satisfied	Very satisfied	Satisfied	Very satisfied	Satisfied	510064888	c8ba513d-fbf1-4171-8fb6-9f07e8708a6c	2025-07-03 16:16:15			submitted_via_web		vg72TbC2cYx2XL4zA5ftJK		uuid:c8ba513d-fbf1-4171-8fb6-9f07e8708a6c	106
28	Male	Single	Tertiary education	Self-employed	Sibling	50,000-100,000	6 months to 1 year	Never	Quite often	Never	Sometimes	Sometimes	Sometimes	Never	Never	Satisfied	Very satisfied	Neutral	Dissatisfied	Very dissatisfied	Dissatisfied	Satisfied	Neutral	510065952	0c01fa4a-3e2f-4b39-a0d9-6a7762b8873f	2025-07-03 16:17:19			submitted_via_web		vg72TbC2cYx2XL4zA5ftJK		uuid:0c01fa4a-3e2f-4b39-a0d9-6a7762b8873f	107
36	Male	Single	Tertiary education	Self-employed	Parent	Above 100,000	Less than 6 months	Sometimes	Always	Never	Quite often	Sometimes	Sometimes	Sometimes	Quite often									510104549	2d77b28b-2efe-4d6f-a34d-f268a599cd01	2025-07-03 17:09:17			submitted_via_web		vg72TbC2cYx2XL4zA5ftJK		uuid:2d77b28b-2efe-4d6f-a34d-f268a599cd01	108
60	Female	Married	Secondary education	Self-employed	Parent	20,000-50,000	1-3 years	Quite often	Always	Never	Quite often	Quite often	Quite often	Quite often	Never	Very dissatisfied	Very satisfied	Dissatisfied	Dissatisfied	Very dissatisfied	Dissatisfied	Very dissatisfied	Very satisfied	510105310	eaeae7a8-bd48-4912-9be1-07540e427556	2025-07-03 17:10:23			submitted_via_web		vg72TbC2cYx2XL4zA5ftJK		uuid:eaeae7a8-bd48-4912-9be1-07540e427556	109
83	Female	Widowed	Primary education	Unemployed	Sibling	Below 20,000	More than 3 years	Never	Never	Never	Never	Never	Never	Never	Never	Very satisfied	Very satisfied	Very satisfied	Very satisfied	Dissatisfied	Satisfied	Very satisfied	Very satisfied	510106408	f525ea3b-1cfa-4bac-83d2-812ba8e60d72	2025-07-03 17:11:52			submitted_via_web		vg72TbC2cYx2XL4zA5ftJK		uuid:f525ea3b-1cfa-4bac-83d2-812ba8e60d72	110
43	Male	Married	Secondary education	Employed (full-time)	Child	50,000-100,000	More than 3 years	Never	Never	Never	Never	Always	Never	Never	Never	Very satisfied	Very satisfied	Very satisfied	Very satisfied	Very dissatisfied	Very satisfied	Very satisfied	Very satisfied	510106899	de2dfe75-aeaa-42af-bd23-1a758f61eb2d	2025-07-03 17:12:50			submitted_via_web		vg72TbC2cYx2XL4zA5ftJK		uuid:de2dfe75-aeaa-42af-bd23-1a758f61eb2d	111
42	Female	Married	Tertiary education	Self-employed	Sibling	20,000-50,000	More than 3 years	Quite often	Sometimes	Never	Never	Never	Never	Always	Never	Satisfied	Very satisfied	Very satisfied	Very satisfied	Satisfied	Satisfied	Very dissatisfied	Very satisfied	510107561	9448f17e-78d0-4402-af97-dc876a1caaf6	2025-07-03 17:14:15			submitted_via_web		vg72TbC2cYx2XL4zA5ftJK		uuid:9448f17e-78d0-4402-af97-dc876a1caaf6	112
23	Male	Single	Secondary education	Employed (full-time)	Child	20,000-50,000	More than 3 years	Never	Never	Never	Never	Rarely	Never	Never	Never	Very satisfied	Very satisfied	Very satisfied	Very satisfied	Satisfied	Very satisfied	Very satisfied	Very satisfied	510108915	572c8916-400e-4cd7-b662-c944cc6b1943	2025-07-03 17:16:55			submitted_via_web		vg72TbC2cYx2XL4zA5ftJK		uuid:572c8916-400e-4cd7-b662-c944cc6b1943	113
45	Male	Married	Secondary education	Self-employed	Spouse	20,000-50,000	6 months to 1 year	Never	Sometimes	Never	Sometimes	Always	Quite often	Quite often	Never	Satisfied	Very satisfied	Very satisfied	Very satisfied	Very dissatisfied	Satisfied	Dissatisfied	Very satisfied	510109454	57f4300a-8252-49a6-81cf-5c0209b7bc1d	2025-07-03 17:17:45			submitted_via_web		vg72TbC2cYx2XL4zA5ftJK		uuid:57f4300a-8252-49a6-81cf-5c0209b7bc1d	114
55	Female	Widowed	Tertiary education	Self-employed	Parent	50,000-100,000	More than 3 years	Sometimes	Sometimes	Never	Never	Always	Sometimes	Never	Never	Very satisfied	Very satisfied	Very satisfied	Very satisfied	Very dissatisfied	Very satisfied	Very satisfied	Very satisfied	510109904	c9b26a10-05a4-4ab8-bc1e-b3c14afba02a	2025-07-03 17:18:37			submitted_via_web		vg72TbC2cYx2XL4zA5ftJK		uuid:c9b26a10-05a4-4ab8-bc1e-b3c14afba02a	115
53	Female	Married	Tertiary education	Employed (full-time)	Sibling	50,000-100,000	More than 3 years	Never	Sometimes	Never	Sometimes	Sometimes	Never	Never	Never	Very satisfied	Very satisfied	Very satisfied	Neutral	Very dissatisfied	Dissatisfied	Dissatisfied	Neutral	510110642	fb3739ab-a408-41ea-a8bc-cddd108165ee	2025-07-03 17:19:49			submitted_via_web		vg72TbC2cYx2XL4zA5ftJK		uuid:fb3739ab-a408-41ea-a8bc-cddd108165ee	116
29	Female	Single	Tertiary education	Employed (full-time)	Sibling	50,000-100,000	More than 3 years	Sometimes	Quite often	Never	Sometimes	Never	Never	Never	Sometimes	Satisfied	Very satisfied	Satisfied	Very satisfied	Very dissatisfied	Neutral	Satisfied	Neutral	510111206	3f674e77-24f7-4fc5-b819-fc12b9f402a7	2025-07-03 17:20:48			submitted_via_web		vg72TbC2cYx2XL4zA5ftJK		uuid:3f674e77-24f7-4fc5-b819-fc12b9f402a7	117
24	Male	Single	Tertiary education	Unemployed	Child		More than 3 years	Rarely	Sometimes	Never	Sometimes	Never	Rarely	Sometimes	Never	Satisfied	Satisfied	Satisfied	Satisfied	Very dissatisfied	Neutral	Neutral	Satisfied	510111778	970bd767-004d-4793-89f2-e7c9dc318e36	2025-07-03 17:21:57			submitted_via_web		vg72TbC2cYx2XL4zA5ftJK		uuid:970bd767-004d-4793-89f2-e7c9dc318e36	118
44	Male	Married	Tertiary education	Employed (full-time)	Spouse	Above 100,000	1-3 years	Rarely	Sometimes	Never	Sometimes	Always	Never	Sometimes	Never	Very satisfied	Very satisfied	Neutral	Neutral	Very dissatisfied	Dissatisfied	Dissatisfied	Satisfied	510112575	7e8be035-162d-4f80-ad4f-df94bb0c752d	2025-07-03 17:23:25			submitted_via_web		vg72TbC2cYx2XL4zA5ftJK		uuid:7e8be035-162d-4f80-ad4f-df94bb0c752d	119
48	Female	Married	Tertiary education	Employed (full-time)	Sibling	20,000-50,000	6 months to 1 year	Quite often	Always	Never	Always	Always	Quite often	Always	Never	Dissatisfied	Very satisfied	Dissatisfied	Satisfied	Very dissatisfied	Satisfied	Satisfied	Satisfied	510113206	cfbb7261-c1e1-4091-a16b-0080178854b0	2025-07-03 17:24:35			submitted_via_web		vg72TbC2cYx2XL4zA5ftJK		uuid:cfbb7261-c1e1-4091-a16b-0080178854b0	120
	Male	Married	Tertiary education	Self-employed	Parent	Below 20,000	More than 3 years	Quite often	Never	Never	Always	Always	Quite often	Sometimes	Never	Very satisfied	Very satisfied	Neutral	Satisfied	Very dissatisfied	Satisfied	Neutral	Very satisfied	510114080	270fc3da-b6f8-4a78-8447-ddb192b80ebc	2025-07-03 17:25:43			submitted_via_web		vg72TbC2cYx2XL4zA5ftJK		uuid:270fc3da-b6f8-4a78-8447-ddb192b80ebc	121
	Female	Divorced/Separated	No formal education	Unemployed	Spouse		6 months to 1 year	Sometimes	Quite often	Quite often	Quite often	Sometimes	Sometimes	Sometimes	Rarely	Neutral	Dissatisfied	Dissatisfied	Dissatisfied	Dissatisfied	Neutral	Neutral	Neutral	510114699	c04b61ce-4c5e-4eed-988b-68a02996c71b	2025-07-03 17:26:33			submitted_via_web		vg72TbC2cYx2XL4zA5ftJK		uuid:c04b61ce-4c5e-4eed-988b-68a02996c71b	122
40	Female	Married	Secondary education	Self-employed	Sibling	20,000-50,000	Less than 6 months	Never	Never	Never	Always	Always	Never	Never	Never	Very satisfied	Very satisfied	Very satisfied	Very satisfied	Very dissatisfied	Very satisfied	Very satisfied	Very satisfied	510115454	a6ab4543-f2e0-4d82-811c-92aefb3dc99d	2025-07-03 17:27:28			submitted_via_web		vg72TbC2cYx2XL4zA5ftJK		uuid:a6ab4543-f2e0-4d82-811c-92aefb3dc99d	123
23	Male	Single	Tertiary education	Self-employed	Sibling	20,000-50,000	Less than 6 months	Never	Rarely	Sometimes	Rarely	Never	Never	Rarely	Never	Neutral	Satisfied	Neutral	Neutral	Dissatisfied	Satisfied	Satisfied	Satisfied	510115968	11822ed7-835e-4e63-bf59-74e680036796	2025-07-03 17:28:24			submitted_via_web		vg72TbC2cYx2XL4zA5ftJK		uuid:11822ed7-835e-4e63-bf59-74e680036796	124
32	Female	Married	Secondary education	Self-employed	Spouse	20,000-50,000	Less than 6 months	Never	Always	Rarely	Always	Always	Always	Always	Never	Very satisfied	Very satisfied	Very satisfied	Very satisfied	Very dissatisfied	Dissatisfied	Dissatisfied	Dissatisfied	510116985	0ef4b083-5ceb-45b8-97e9-201b160be846	2025-07-03 17:29:56			submitted_via_web		vg72TbC2cYx2XL4zA5ftJK		uuid:0ef4b083-5ceb-45b8-97e9-201b160be846	125
	Female	Married	Tertiary education	Self-employed	Sibling	Below 20,000	1-3 years	Never	Sometimes	Never	Never	Always	Always	Quite often	Never	Very satisfied	Very satisfied	Very satisfied	Satisfied	Very dissatisfied	Neutral	Satisfied	Satisfied	510117592	ea289489-7075-4cfe-92ea-396c1bdb9e19	2025-07-03 17:30:46			submitted_via_web		vg72TbC2cYx2XL4zA5ftJK		uuid:ea289489-7075-4cfe-92ea-396c1bdb9e19	126
55	Female	Married	Primary education	Self-employed	Parent	Below 20,000	Less than 6 months	Quite often	Always	Never	Always	Always	Quite often	Always	Never	Dissatisfied	Very satisfied	Dissatisfied	Very satisfied	Very dissatisfied	Very satisfied	Very satisfied	Very satisfied	510118135	7595fb78-e3cf-454a-a9db-e3f35d931926	2025-07-03 17:31:38			submitted_via_web		vg72TbC2cYx2XL4zA5ftJK		uuid:7595fb78-e3cf-454a-a9db-e3f35d931926	127
55	Female	Widowed	Secondary education	Self-employed	Parent	20,000-50,000	Less than 6 months	Quite often	Always	Never	Never	Always	Always	Always	Never	Very dissatisfied	Very satisfied	Very dissatisfied	Very satisfied	Very dissatisfied	Satisfied	Dissatisfied	Very satisfied	510120071	821aa12e-3320-4750-ae85-9c6245ef313c	2025-07-03 17:34:56			submitted_via_web		vg72TbC2cYx2XL4zA5ftJK		uuid:821aa12e-3320-4750-ae85-9c6245ef313c	128
45	Female	Married	Secondary education	Employed (full-time)	Sibling	50,000-100,000	More than 3 years	Never	Never	Never	Never	Never	Never	Sometimes	Never	Very satisfied	Very satisfied	Very satisfied	Very satisfied	Satisfied	Satisfied	Satisfied	Satisfied	510120555	4844d574-4eac-4625-b054-2546c1dbe4c5	2025-07-03 17:35:47			submitted_via_web		vg72TbC2cYx2XL4zA5ftJK		uuid:4844d574-4eac-4625-b054-2546c1dbe4c5	129
34	Male	Married	Tertiary education	Self-employed	Child	Above 100,000	More than 3 years	Quite often	Sometimes	Never	Sometimes	Always	Always	Sometimes	Never	Very satisfied	Very satisfied	Dissatisfied	Very dissatisfied	Very satisfied	Very satisfied	Very satisfied	Very satisfied	510121222	cf152970-808c-4aa9-a6f1-d44cb46a00f4	2025-07-03 17:36:47			submitted_via_web		vg72TbC2cYx2XL4zA5ftJK		uuid:cf152970-808c-4aa9-a6f1-d44cb46a00f4	130
35	Female	Married	Tertiary education	Self-employed	Parent	20,000-50,000	More than 3 years	Never	Sometimes	Never	Always	Always	Never	Always	Never	Very satisfied	Very satisfied	Neutral	Very satisfied	Very dissatisfied	Dissatisfied	Neutral	Neutral	510123492	009e3c43-f99a-44b2-95ee-c30325bc10ef	2025-07-03 17:39:34			submitted_via_web		vg72TbC2cYx2XL4zA5ftJK		uuid:009e3c43-f99a-44b2-95ee-c30325bc10ef	131
34	Female	Married	Tertiary education	Self-employed	Parent	Below 20,000	More than 3 years	Never	Quite often	Never	Never	Always	Always	Always	Never	Very satisfied	Very satisfied	Satisfied	Satisfied	Very dissatisfied	Satisfied	Dissatisfied	Very satisfied	510124114	3311cb06-4ba8-4e62-9031-3c602f43c391	2025-07-03 17:40:36			submitted_via_web		vg72TbC2cYx2XL4zA5ftJK		uuid:3311cb06-4ba8-4e62-9031-3c602f43c391	132
61	Female	Widowed	Primary education	Self-employed	Parent	Below 20,000	More than 3 years	Sometimes	Never	Never	Always	Quite often	Always	Always	Never	Dissatisfied	Very satisfied	Very dissatisfied	Very satisfied	Very dissatisfied	Neutral	Satisfied	Satisfied	510124730	65d08cf9-43f4-4cf1-a093-18a0f2b035bc	2025-07-03 17:41:39			submitted_via_web		vg72TbC2cYx2XL4zA5ftJK		uuid:65d08cf9-43f4-4cf1-a093-18a0f2b035bc	133
47	Female	Married	Secondary education	Self-employed	Parent	Below 20,000	More than 3 years	Quite often	Always	Never	Always	Always	Rarely	Always	Never	Very dissatisfied	Very satisfied	Dissatisfied	Very satisfied	Very dissatisfied	Satisfied	Dissatisfied	Neutral	510125989	5ce83f26-eb50-41e7-91c4-f8c02e5296f1	2025-07-03 17:44:01			submitted_via_web		vg72TbC2cYx2XL4zA5ftJK		uuid:5ce83f26-eb50-41e7-91c4-f8c02e5296f1	134
20	Female	Single	Tertiary education	Unemployed	Child	Below 20,000	More than 3 years	Never	Never	Never	Never	Never	Never	Never	Never	Neutral	Neutral	Neutral	Satisfied	Dissatisfied	Neutral	Neutral	Satisfied	510126427	051fb1de-c765-4205-8355-620e6cc27df3	2025-07-03 17:44:47			submitted_via_web		vg72TbC2cYx2XL4zA5ftJK		uuid:051fb1de-c765-4205-8355-620e6cc27df3	135
	Male	Single	Secondary education	Self-employed	Sibling	20,000-50,000	More than 3 years	Rarely	Sometimes	Never	Rarely	Sometimes	Sometimes	Always	Sometimes	Neutral	Satisfied	Satisfied	Neutral	Dissatisfied	Very dissatisfied	Neutral	Very satisfied	510127091	9bd208e7-98a2-4b23-86cb-47843d78a459	2025-07-03 17:45:41			submitted_via_web		vg72TbC2cYx2XL4zA5ftJK		uuid:9bd208e7-98a2-4b23-86cb-47843d78a459	136
50	Female	Married	Tertiary education	Employed (full-time)	Spouse	50,000-100,000	More than 3 years	Never	Never	Never	Never	Always	Always	Sometimes	Never	Very satisfied	Very satisfied	Very satisfied	Very satisfied	Very dissatisfied	Very satisfied	Neutral	Very satisfied	510128584	e5dd9ce6-0c26-4099-b057-b7223873bdc0	2025-07-03 17:47:43			submitted_via_web		vg72TbC2cYx2XL4zA5ftJK		uuid:e5dd9ce6-0c26-4099-b057-b7223873bdc0	137
44	Male	Married	Primary education	Self-employed	Spouse	20,000-50,000	1-3 years	Never	Always	Never	Sometimes	Always	Sometimes	Never	Never	Very satisfied	Very satisfied	Very satisfied	Very satisfied	Dissatisfied	Satisfied	Dissatisfied	Dissatisfied	510129996	ad10c9cb-8c41-4fff-8603-dc1476fba2f6	2025-07-03 17:49:40			submitted_via_web		vg72TbC2cYx2XL4zA5ftJK		uuid:ad10c9cb-8c41-4fff-8603-dc1476fba2f6	138
25	Male	Single	Secondary education	Self-employed	Parent	20,000-50,000	1-3 years	Never	Never	Never	Never	Always	Always	Always	Never	Very satisfied	Very satisfied	Very satisfied	Very satisfied	Very dissatisfied	Very satisfied	Dissatisfied	Very satisfied	510130626	b944a7a3-c593-4bce-aab3-ec1347cbcf48	2025-07-03 17:50:42			submitted_via_web		vg72TbC2cYx2XL4zA5ftJK		uuid:b944a7a3-c593-4bce-aab3-ec1347cbcf48	139
38	Female	Married	Secondary education	Self-employed	Spouse	20,000-50,000	More than 3 years	Sometimes	Always	Never	Rarely	Always	Always	Always	Never	Dissatisfied	Very satisfied	Dissatisfied	Very satisfied	Very dissatisfied	Very satisfied	Dissatisfied	Very satisfied	510131150	f1251191-e9c9-4b7c-9b7a-b28239c227e5	2025-07-03 17:51:48			submitted_via_web		vg72TbC2cYx2XL4zA5ftJK		uuid:f1251191-e9c9-4b7c-9b7a-b28239c227e5	140
44	Male	Married	Secondary education	Self-employed	Spouse	Above 100,000	Less than 6 months	Sometimes	Always	Never	Never	Always	Always	Always	Never	Very satisfied	Very satisfied	Very satisfied	Very satisfied	Very dissatisfied	Very satisfied	Dissatisfied	Very satisfied	510131996	9a0c9e18-3bd2-43d5-824a-4bc3ece7c718	2025-07-03 17:53:13			submitted_via_web		vg72TbC2cYx2XL4zA5ftJK		uuid:9a0c9e18-3bd2-43d5-824a-4bc3ece7c718	141
34	Male	Single	Tertiary education	Self-employed	Sibling	50,000-100,000	More than 3 years	Never	Never	Never	Sometimes	Always	Always	Always	Never	Dissatisfied	Very satisfied	Satisfied	Very satisfied	Very dissatisfied	Very satisfied	Dissatisfied	Very satisfied	510132432	3b391740-81be-4657-b0b8-330f125b0ac9	2025-07-03 17:54:11			submitted_via_web		vg72TbC2cYx2XL4zA5ftJK		uuid:3b391740-81be-4657-b0b8-330f125b0ac9	142
	Female	Married	Secondary education	Self-employed	Parent	Below 20,000	6 months to 1 year	Quite often	Never	Never	Never	Always	Never	Sometimes	Never	Very satisfied	Very satisfied	Very satisfied	Very satisfied	Satisfied	Satisfied	Satisfied	Very satisfied	510133010	7a7a0fc5-b420-4b3d-aec3-b54a7bbf23db	2025-07-03 17:55:26			submitted_via_web		vg72TbC2cYx2XL4zA5ftJK		uuid:7a7a0fc5-b420-4b3d-aec3-b54a7bbf23db	143
24	Male	Single	Tertiary education	Unemployed	Sibling	Below 20,000	6 months to 1 year	Never	Sometimes	Never	Never	Sometimes	Sometimes	Never	Never	Very satisfied	Very satisfied	Very satisfied	Very satisfied	Neutral	Neutral	Neutral	Very satisfied	510133595	334ce584-8c19-463f-8280-68e7bb3190b6	2025-07-03 17:56:25			submitted_via_web		vg72TbC2cYx2XL4zA5ftJK		uuid:334ce584-8c19-463f-8280-68e7bb3190b6	144
25	Female	Single	Tertiary education	Self-employed	Child	20,000-50,000	More than 3 years	Never	Sometimes	Never	Never	Always	Sometimes	Sometimes	Never	Very satisfied	Very satisfied	Very satisfied	Very satisfied	Very dissatisfied	Very satisfied	Very satisfied	Very satisfied	510134221	adc18a1c-5a1e-4d7f-9bd3-38929c0fbabd	2025-07-03 17:57:19			submitted_via_web		vg72TbC2cYx2XL4zA5ftJK		uuid:adc18a1c-5a1e-4d7f-9bd3-38929c0fbabd	145
	Male	Married	Tertiary education	Self-employed	Sibling	Above 100,000	1-3 years	Sometimes	Sometimes	Never	Never	Never	Never	Never	Never	Very satisfied	Very satisfied	Very satisfied	Very satisfied	Neutral	Very satisfied	Very satisfied	Very satisfied	510134734	49e54c87-1e89-4307-95ac-67007387fac7	2025-07-03 17:58:11			submitted_via_web		vg72TbC2cYx2XL4zA5ftJK		uuid:49e54c87-1e89-4307-95ac-67007387fac7	146
74	Male	Widowed	Primary education	Self-employed	Parent	Below 20,000	1-3 years	Never	Always	Never	Never	Never	Always	Always	Never	Dissatisfied	Very satisfied	Dissatisfied	Very satisfied	Very dissatisfied	Neutral	Dissatisfied	Very satisfied	510135569	aa0f296d-1f6c-4015-bb9a-7e0f1cd3afc5	2025-07-03 17:59:36			submitted_via_web		vg72TbC2cYx2XL4zA5ftJK		uuid:aa0f296d-1f6c-4015-bb9a-7e0f1cd3afc5	147
27	Male	Single	Tertiary education	Employed (part-time)	Sibling	Above 100,000	Less than 6 months	Rarely	Rarely	Rarely	Sometimes	Sometimes	Rarely	Sometimes	Quite often	Satisfied	Very satisfied	Satisfied	Satisfied	Satisfied	Neutral	Neutral	Neutral	510135987	11486cda-6d93-46b7-81a6-d02e8957936c	2025-07-03 18:00:39			submitted_via_web		vg72TbC2cYx2XL4zA5ftJK		uuid:11486cda-6d93-46b7-81a6-d02e8957936c	148
40	Female	Single		Employed (full-time)	Sibling	50,000-100,000	Less than 6 months	Always	Sometimes	Never	Never	Never	Never	Never	Never	Satisfied	Satisfied	Satisfied	Satisfied	Very satisfied	Neutral	Very satisfied	Very satisfied	510136668	ed8335d5-5256-44d5-b06f-1d545f020651	2025-07-03 18:02:01			submitted_via_web		vg72TbC2cYx2XL4zA5ftJK		uuid:ed8335d5-5256-44d5-b06f-1d545f020651	149
82	Female	Widowed	Tertiary education	Unemployed	Parent	Below 20,000	More than 3 years	Rarely	Sometimes	Never	Never	Never	Never	Never	Never	Very satisfied	Very satisfied	Very satisfied	Very satisfied	Satisfied	Very satisfied	Very satisfied	Very satisfied	510137262	20694421-9675-41e4-9a90-704a28cdefa1	2025-07-03 18:03:01			submitted_via_web		vg72TbC2cYx2XL4zA5ftJK		uuid:20694421-9675-41e4-9a90-704a28cdefa1	150
48	Male	Married	Tertiary education	Self-employed	Sibling	Above 100,000	More than 3 years	Never	Quite often	Never	Always	Always	Never	Never	Never	Very satisfied	Very satisfied	Very satisfied	Very satisfied	Very dissatisfied	Very satisfied	Very satisfied	Very satisfied	510163231	507506ef-0a60-40ae-bd59-f27a2a2d9683	2025-07-03 18:57:38			submitted_via_web		vg72TbC2cYx2XL4zA5ftJK		uuid:507506ef-0a60-40ae-bd59-f27a2a2d9683	151
42	Male	Married	Secondary education	Self-employed	Spouse	20,000-50,000	6 months to 1 year	Never	Never	Never	Sometimes	Always	Sometimes	Never	Never	Very satisfied	Very satisfied	Very satisfied	Very satisfied	Very dissatisfied	Very satisfied	Dissatisfied	Very satisfied	510163828	73c23cb2-53d2-4666-94d7-3eab9409ace3	2025-07-03 18:58:51			submitted_via_web		vg72TbC2cYx2XL4zA5ftJK		uuid:73c23cb2-53d2-4666-94d7-3eab9409ace3	152
63	Male	Married	Tertiary education	Self-employed	Parent	Above 100,000	Less than 6 months	Sometimes	Always	Never	Always	Always	Never	Always	Never	Dissatisfied	Dissatisfied	Dissatisfied	Neutral	Very dissatisfied	Very satisfied	Very satisfied	Very satisfied	510164248	a6bd0341-fda0-4afe-9de5-7743f2a7c96c	2025-07-03 18:59:51			submitted_via_web		vg72TbC2cYx2XL4zA5ftJK		uuid:a6bd0341-fda0-4afe-9de5-7743f2a7c96c	153
35	Female	Married	Secondary education	Self-employed	Sibling	20,000-50,000	More than 3 years	Never	Never	Never	Never	Always	Sometimes	Always	Never	Very satisfied	Very satisfied	Very satisfied	Very satisfied	Very satisfied	Very satisfied	Very satisfied	Very satisfied	510164634	753cff13-45c2-4560-80c0-467fe4267e5d	2025-07-03 19:00:50			submitted_via_web		vg72TbC2cYx2XL4zA5ftJK		uuid:753cff13-45c2-4560-80c0-467fe4267e5d	154
38	Female	Married	Tertiary education	Employed (full-time)	Child	Above 100,000	Less than 6 months	Always	Always	Never	Sometimes	Always	Sometimes	Sometimes	Never	Very satisfied	Very satisfied	Very satisfied	Very satisfied	Very dissatisfied	Neutral	Neutral	Neutral	510164982	3b9d67e9-4443-4a75-95c3-f47e98b327df	2025-07-03 19:01:39			submitted_via_web		vg72TbC2cYx2XL4zA5ftJK		uuid:3b9d67e9-4443-4a75-95c3-f47e98b327df	155
61	Male	Married	Primary education	Self-employed	Sibling	20,000-50,000	Less than 6 months	Never	Always	Never	Sometimes	Sometimes	Always	Always	Never	Dissatisfied	Very satisfied	Dissatisfied	Very satisfied	Very dissatisfied	Neutral	Dissatisfied	Dissatisfied	510165722	6a9604b3-a33a-4ae9-a7d0-ed9d5e305d95	2025-07-03 19:03:02			submitted_via_web		vg72TbC2cYx2XL4zA5ftJK		uuid:6a9604b3-a33a-4ae9-a7d0-ed9d5e305d95	156
	Male	Single	Tertiary education	Employed (full-time)	Sibling	Above 100,000	Less than 6 months	Sometimes	Sometimes	Never	Always	Rarely	Sometimes	Quite often	Quite often	Very satisfied	Very satisfied	Satisfied	Very satisfied	Neutral	Satisfied	Very satisfied	Neutral	510166281	53f4fc5b-a7f9-4cf8-b66b-ab05e7b65ade	2025-07-03 19:04:00			submitted_via_web		vg72TbC2cYx2XL4zA5ftJK		uuid:53f4fc5b-a7f9-4cf8-b66b-ab05e7b65ade	157
38	Female	Married	Tertiary education	Self-employed	Sibling	Below 20,000	Less than 6 months	Never	Never	Never	Sometimes	Sometimes	Rarely	Sometimes	Never	Very satisfied	Very satisfied	Very satisfied	Very satisfied	Very dissatisfied	Very satisfied	Neutral	Dissatisfied	510166728	c4d78344-d32a-43bf-830c-57f66f021e31	2025-07-03 19:05:06			submitted_via_web		vg72TbC2cYx2XL4zA5ftJK		uuid:c4d78344-d32a-43bf-830c-57f66f021e31	158
21		Single	Secondary education	Self-employed	Sibling	Below 20,000	6 months to 1 year	Never	Never	Never	Never	Never	Never	Sometimes	Never	Very dissatisfied	Very satisfied	Very satisfied	Very satisfied	Very satisfied	Very satisfied	Very satisfied	Very satisfied	510167150	cc760598-ce79-4402-ba43-cf23ef732b21	2025-07-03 19:06:05			submitted_via_web		vg72TbC2cYx2XL4zA5ftJK		uuid:cc760598-ce79-4402-ba43-cf23ef732b21	159
18	Female	Single	Secondary education	Unemployed	Sibling	Below 20,000	More than 3 years	Never	Never	Never	Sometimes	Never	Never	Sometimes	Never	Very satisfied	Very satisfied	Very satisfied	Very satisfied	Very satisfied	Very satisfied	Very satisfied	Very satisfied	510167562	2bf8241b-5e94-4fde-ab2e-72fe466233f1	2025-07-03 19:06:59			submitted_via_web		vg72TbC2cYx2XL4zA5ftJK		uuid:2bf8241b-5e94-4fde-ab2e-72fe466233f1	160
	Female		Primary education	Self-employed	Parent	20,000-50,000		Never	Never	Never	Sometimes	Never	Always	Never	Never	Very satisfied	Very satisfied	Very satisfied	Very satisfied	Very dissatisfied	Very satisfied	Dissatisfied	Very satisfied	510168039	6ddb7710-4e09-4e7b-9939-fd1c0def9d9c	2025-07-03 19:07:47			submitted_via_web		vg72TbC2cYx2XL4zA5ftJK		uuid:6ddb7710-4e09-4e7b-9939-fd1c0def9d9c	161
	Female	Married	Primary education	Self-employed	Parent	Below 20,000	Less than 6 months	Sometimes	Never	Never	Never	Never	Never	Never	Never	Dissatisfied	Very satisfied	Very satisfied	Very satisfied	Very dissatisfied	Satisfied	Very satisfied	Very satisfied	510169631	4eb39659-32f2-4977-9e1e-c5e2ff648363	2025-07-03 19:10:46			submitted_via_web		vg72TbC2cYx2XL4zA5ftJK		uuid:4eb39659-32f2-4977-9e1e-c5e2ff648363	162
62	Female	Married	Secondary education	Employed (full-time)	Parent	50,000-100,000	1-3 years	Quite often	Never	Never	Never	Always	Sometimes	Never	Never	Very satisfied	Very satisfied	Very satisfied	Very satisfied	Very dissatisfied	Very satisfied	Dissatisfied	Neutral	510170357	727b6591-7f01-42ae-93a1-3dc148c9004a	2025-07-03 19:11:46			submitted_via_web		vg72TbC2cYx2XL4zA5ftJK		uuid:727b6591-7f01-42ae-93a1-3dc148c9004a	163
65	Male	Married	No formal education	Self-employed	Parent	Below 20,000	Less than 6 months	Never	Never	Never	Sometimes	Never	Never	Never	Never	Very satisfied	Very satisfied	Very satisfied	Very satisfied	Very dissatisfied	Very satisfied	Very satisfied	Very satisfied	510170951	00e9edef-164d-47fa-9565-f7398cc5d818	2025-07-03 19:12:40			submitted_via_web		vg72TbC2cYx2XL4zA5ftJK		uuid:00e9edef-164d-47fa-9565-f7398cc5d818	164
34	Male	Single	Tertiary education	Self-employed	Sibling	Above 100,000	More than 3 years	Sometimes	Sometimes	Never	Sometimes	Sometimes	Sometimes	Sometimes	Never	Very satisfied	Very satisfied	Dissatisfied	Very satisfied	Very dissatisfied	Satisfied	Very satisfied	Very satisfied	510171761	c897a5f1-683d-45eb-b4a6-46c88b935ebd	2025-07-03 19:13:36			submitted_via_web		vg72TbC2cYx2XL4zA5ftJK		uuid:c897a5f1-683d-45eb-b4a6-46c88b935ebd	165
17	Female	Single	Secondary education	Unemployed	Child	Below 20,000	6 months to 1 year	Never	Never	Sometimes	Sometimes	Never	Never	Never	Never	Very satisfied	Very satisfied	Very satisfied	Very satisfied	Very satisfied	Very satisfied	Very satisfied	Very satisfied	510172228	d3e5685a-ba0a-45eb-a8dd-e4bf51b96fd1	2025-07-03 19:14:30			submitted_via_web		vg72TbC2cYx2XL4zA5ftJK		uuid:d3e5685a-ba0a-45eb-a8dd-e4bf51b96fd1	166
59	Male	Married	Secondary education	Self-employed	Parent	20,000-50,000	More than 3 years	Quite often	Always	Never	Always	Always	Always	Never	Never	Very satisfied	Very satisfied	Very satisfied	Very satisfied	Very satisfied	Very satisfied	Very satisfied	Very satisfied	510172634	9c16ec67-faa6-4d20-acb2-b4876f8de92f	2025-07-03 19:15:16			submitted_via_web		vg72TbC2cYx2XL4zA5ftJK		uuid:9c16ec67-faa6-4d20-acb2-b4876f8de92f	167
31	Female	Single	Tertiary education	Self-employed	Parent	Above 100,000	More than 3 years	Never	Never	Never	Never	Sometimes	Quite often	Never	Never	Satisfied	Very satisfied	Very satisfied	Neutral	Dissatisfied	Very satisfied	Neutral	Very satisfied	510173222	751ca6ab-7a55-4232-a2ae-9cd6ff9d7ce1	2025-07-03 19:16:29			submitted_via_web		vg72TbC2cYx2XL4zA5ftJK		uuid:751ca6ab-7a55-4232-a2ae-9cd6ff9d7ce1	168
30	Male	Married	Secondary education	Self-employed	Sibling	50,000-100,000	1-3 years	Never	Sometimes	Never	Sometimes	Always	Always	Always	Never	Very satisfied	Very satisfied	Very satisfied	Very satisfied	Very dissatisfied	Very satisfied	Dissatisfied	Very satisfied	510176145	3a847da9-4261-47a4-8bc8-c9c9259804a7	2025-07-03 19:23:22			submitted_via_web		vg72TbC2cYx2XL4zA5ftJK		uuid:3a847da9-4261-47a4-8bc8-c9c9259804a7	169
30	Male	Married	Secondary education	Self-employed	Sibling	50,000-100,000	1-3 years	Never	Sometimes	Rarely	Sometimes	Always	Always	Always	Never	Very satisfied	Very satisfied	Very satisfied	Very satisfied	Very dissatisfied	Very satisfied	Dissatisfied	Very satisfied	510177234	202f434e-e47c-483b-90e9-bd7b01cb79b6	2025-07-03 19:26:24			submitted_via_web		vg72TbC2cYx2XL4zA5ftJK		uuid:202f434e-e47c-483b-90e9-bd7b01cb79b6	170
30	Female	Married	Tertiary education	Employed (full-time)	Parent	20,000-50,000	6 months to 1 year	Never	Never	Never	Never	Never	Never	Never	Never	Very satisfied	Very satisfied	Very satisfied	Very satisfied	Very dissatisfied	Very satisfied	Very satisfied	Very satisfied	510181618	a48f1965-915a-45d8-a268-929dce4bc539	2025-07-03 19:37:18			submitted_via_web		vg72TbC2cYx2XL4zA5ftJK		uuid:a48f1965-915a-45d8-a268-929dce4bc539	171
20	Female	Single	Secondary education	Self-employed	Child	20,000-50,000	Less than 6 months	Sometimes	Sometimes	Sometimes	Sometimes	Quite often	Sometimes	Sometimes	Never	Very satisfied	Very satisfied	Satisfied	Very satisfied	Very dissatisfied	Neutral	Very satisfied	Very satisfied	510182098	9e0141b4-26ca-4fb4-97d2-007d3c0bbfb1	2025-07-03 19:38:13			submitted_via_web		vg72TbC2cYx2XL4zA5ftJK		uuid:9e0141b4-26ca-4fb4-97d2-007d3c0bbfb1	172
45	Male	Married	Primary education	Self-employed	Spouse	20,000-50,000	Less than 6 months	Sometimes	Always	Never	Always	Always	Always	Always	Never	Very satisfied	Very satisfied	Very satisfied	Very satisfied	Very dissatisfied	Very satisfied	Very dissatisfied	Very satisfied	510182499	0b2fd3b5-e6d4-46b3-9476-2e728e7d8d06	2025-07-03 19:39:00			submitted_via_web		vg72TbC2cYx2XL4zA5ftJK		uuid:0b2fd3b5-e6d4-46b3-9476-2e728e7d8d06	173
48	Male	Divorced/Separated	Tertiary education	Employed (full-time)	Spouse	Above 100,000	More than 3 years	Sometimes	Rarely	Never	Rarely	Never	Never	Never	Never	Very satisfied	Very satisfied	Very satisfied	Very satisfied	Satisfied	Very satisfied	Very satisfied	Very satisfied	510183471	1b486ff5-0934-49bf-89d8-f4cfd9ed8c40	2025-07-03 19:40:56			submitted_via_web		vg72TbC2cYx2XL4zA5ftJK		uuid:1b486ff5-0934-49bf-89d8-f4cfd9ed8c40	174
	Female	Single	Tertiary education	Unemployed	Child	Below 20,000	More than 3 years	Never	Rarely	Never	Never	Never	Never	Sometimes	Never	Very satisfied	Very satisfied	Very satisfied	Very satisfied	Very satisfied	Very satisfied	Very satisfied	Very satisfied	510183928	91bedcac-5894-4317-bab8-34179c2b6fbc	2025-07-03 19:41:55			submitted_via_web		vg72TbC2cYx2XL4zA5ftJK		uuid:91bedcac-5894-4317-bab8-34179c2b6fbc	175
	Female	Divorced/Separated	Tertiary education	Self-employed	Child	Above 100,000	More than 3 years	Rarely	Sometimes	Rarely	Sometimes	Rarely	Never	Rarely	Never	Satisfied	Very satisfied	Satisfied	Very satisfied	Very satisfied	Satisfied	Very satisfied	Very satisfied	510184269	4d11d389-8a5b-4e42-ae35-b768837d9dd7	2025-07-03 19:42:43			submitted_via_web		vg72TbC2cYx2XL4zA5ftJK		uuid:4d11d389-8a5b-4e42-ae35-b768837d9dd7	176
59	Male	Married	Tertiary education	Self-employed	Spouse	Above 100,000	1-3 years	Sometimes	Sometimes	Never	Rarely	Quite often	Never	Never	Never	Satisfied	Very satisfied	Neutral	Very satisfied	Satisfied	Very satisfied	Very satisfied	Very satisfied	510184661	01c5a6ab-e763-4d3c-a1b4-a38c0efab1f4	2025-07-03 19:43:36			submitted_via_web		vg72TbC2cYx2XL4zA5ftJK		uuid:01c5a6ab-e763-4d3c-a1b4-a38c0efab1f4	177
65	Male	Married	Secondary education	Self-employed	Parent	20,000-50,000	More than 3 years	Never	Never	Never	Never	Never	Never	Never	Never	Neutral	Very satisfied	Neutral	Very satisfied	Very dissatisfied	Very satisfied	Very satisfied	Very satisfied	510185221	d0147881-ca78-454b-b375-4669824e0a06	2025-07-03 19:44:39			submitted_via_web		vg72TbC2cYx2XL4zA5ftJK		uuid:d0147881-ca78-454b-b375-4669824e0a06	178
21	Female	Single	Tertiary education	Self-employed	Parent	50,000-100,000	More than 3 years	Rarely	Sometimes	Rarely	Sometimes	Rarely	Sometimes	Sometimes	Rarely	Dissatisfied	Satisfied	Dissatisfied	Satisfied	Satisfied	Neutral	Satisfied	Satisfied	510186753	fad305b4-0474-4ab6-a697-588cfa319b1c	2025-07-03 19:48:06			submitted_via_web		vg72TbC2cYx2XL4zA5ftJK		uuid:fad305b4-0474-4ab6-a697-588cfa319b1c	179
40	Female	Married	Secondary education	Self-employed	Parent	Below 20,000	Less than 6 months	Quite often	Always	Never	Always	Always	Always	Always	Never	Satisfied	Very satisfied	Dissatisfied	Very satisfied	Very dissatisfied	Dissatisfied	Dissatisfied	Dissatisfied	510186956	913b5fce-8520-4e96-bfce-e204427b4ccc	2025-07-03 19:48:55			submitted_via_web		vg72TbC2cYx2XL4zA5ftJK		uuid:913b5fce-8520-4e96-bfce-e204427b4ccc	180
36	Female	Married	Tertiary education	Employed (full-time)	Sibling	50,000-100,000	More than 3 years	Sometimes	Sometimes	Never	Sometimes	Sometimes	Sometimes	Quite often	Always	Satisfied	Satisfied	Very satisfied	Very satisfied	Dissatisfied	Satisfied	Very satisfied	Very satisfied	510187358	97d7574d-441f-4753-9b93-012854e37d49	2025-07-03 19:50:10			submitted_via_web		vg72TbC2cYx2XL4zA5ftJK		uuid:97d7574d-441f-4753-9b93-012854e37d49	181
34	Female	Single	Secondary education	Self-employed	Parent	50,000-100,000	Less than 6 months	Never	Never	Never	Never	Never	Never	Never	Never	Very satisfied	Very satisfied	Very satisfied	Very satisfied	Very satisfied	Very satisfied	Satisfied	Satisfied	510187623	2f206e83-624f-402d-97bd-2928ca74659f	2025-07-03 19:50:59			submitted_via_web		vg72TbC2cYx2XL4zA5ftJK		uuid:2f206e83-624f-402d-97bd-2928ca74659f	182
26	Female	Single	Secondary education	Employed (full-time)	Sibling	20,000-50,000	Less than 6 months	Never	Sometimes	Never	Sometimes	Always	Never	Always	Never	Very satisfied	Very satisfied	Very satisfied	Very satisfied	Dissatisfied	Very satisfied	Very satisfied	Very satisfied	510187900	0f57bd9b-2fca-4c46-a54c-adb45e58e062	2025-07-03 19:51:53			submitted_via_web		vg72TbC2cYx2XL4zA5ftJK		uuid:0f57bd9b-2fca-4c46-a54c-adb45e58e062	183
58	Female	Married	Secondary education	Self-employed	Spouse	Below 20,000	Less than 6 months	Never	Never	Never	Never	Always	Never	Never	Never	Very satisfied	Very satisfied	Very satisfied	Very satisfied	Very dissatisfied	Very satisfied	Very satisfied	Very satisfied	510188481	03183a4b-1405-4173-9f52-13d99e83b48d	2025-07-03 19:53:20			submitted_via_web		vg72TbC2cYx2XL4zA5ftJK		uuid:03183a4b-1405-4173-9f52-13d99e83b48d	184
21	Female	Single	Tertiary education	Self-employed	Sibling	20,000-50,000	Less than 6 months	Quite often	Always	Sometimes	Quite often	Sometimes		Quite often	Sometimes	Satisfied	Satisfied	Satisfied	Satisfied	Neutral	Neutral	Neutral	Neutral	510189322	66efe2f5-b999-4a23-b542-09d1c6d715e4	2025-07-03 19:55:20			submitted_via_web		vg72TbC2cYx2XL4zA5ftJK		uuid:66efe2f5-b999-4a23-b542-09d1c6d715e4	185
35	Female	Married	Secondary education	Employed (full-time)	Parent	20,000-50,000	6 months to 1 year	Sometimes	Sometimes	Never	Sometimes	Always	Always	Always	Never	Very satisfied	Very satisfied	Very satisfied	Very satisfied	Very dissatisfied	Very satisfied	Very satisfied	Very satisfied	510189610	65034b73-a3e2-4e7f-a9a6-8762accfa70e	2025-07-03 19:56:10			submitted_via_web		vg72TbC2cYx2XL4zA5ftJK		uuid:65034b73-a3e2-4e7f-a9a6-8762accfa70e	186
19	Female	Single	Secondary education	Employed (part-time)	Sibling	Below 20,000	6 months to 1 year	Quite often	Quite often	Never	Sometimes	Always	Never	Always	Never	Very satisfied	Very satisfied	Very satisfied	Very satisfied	Very dissatisfied	Dissatisfied	Very satisfied	Very satisfied	510189941	c4c341e0-1bb6-4982-a635-999b375ee1ff	2025-07-03 19:57:08			submitted_via_web		vg72TbC2cYx2XL4zA5ftJK		uuid:c4c341e0-1bb6-4982-a635-999b375ee1ff	187
69	Male	Married	Tertiary education	Employed (part-time)	Parent	Above 100,000	More than 3 years	Never	Never	Never	Sometimes	Never	Never	Never	Never	Satisfied	Satisfied	Very satisfied	Very satisfied	Satisfied	Very satisfied	Very satisfied	Very satisfied	510190277	87f9eac2-56ff-4dfd-8cd1-87f28c4f8900	2025-07-03 19:57:58			submitted_via_web		vg72TbC2cYx2XL4zA5ftJK		uuid:87f9eac2-56ff-4dfd-8cd1-87f28c4f8900	188
	Female	Single	Secondary education	Self-employed	Sibling	Below 20,000	Less than 6 months	Never	Always	Never	Always	Always	Always	Always	Never	Satisfied	Very satisfied	Very satisfied	Very satisfied	Very satisfied	Very satisfied	Very satisfied	Very satisfied	510190818	8e317f1d-345d-48f5-860b-353c931fc2e8	2025-07-03 19:59:39			submitted_via_web		vg72TbC2cYx2XL4zA5ftJK		uuid:8e317f1d-345d-48f5-860b-353c931fc2e8	189
45	Female	Widowed	Secondary education	Self-employed	Parent	Below 20,000	More than 3 years	Never	Always	Never	Always	Always	Always	Always	Always	Dissatisfied	Very satisfied	Dissatisfied	Very satisfied	Very dissatisfied	Satisfied	Satisfied	Satisfied	510191169	0d1d702c-b1ae-436c-8e52-159448645a0a	2025-07-03 20:00:55			submitted_via_web		vg72TbC2cYx2XL4zA5ftJK		uuid:0d1d702c-b1ae-436c-8e52-159448645a0a	190
44	Female	Married	Tertiary education	Employed (full-time)	Parent	Above 100,000	Less than 6 months	Sometimes	Sometimes	Never	Sometimes	Never	Never	Sometimes	Never	Very satisfied	Very satisfied	Very satisfied	Very satisfied	Very satisfied	Very satisfied	Very satisfied	Very satisfied	510191694	daa0d4ec-ca0e-4bbc-9efa-8ec6aea41e78	2025-07-03 20:01:54			submitted_via_web		vg72TbC2cYx2XL4zA5ftJK		uuid:daa0d4ec-ca0e-4bbc-9efa-8ec6aea41e78	191
	Male	Married	Tertiary education	Self-employed	Sibling	Below 20,000	Less than 6 months	Sometimes	Quite often	Sometimes	Always	Always	Always	Always	Never	Very satisfied	Very satisfied	Dissatisfied	Dissatisfied	Very dissatisfied	Dissatisfied	Dissatisfied	Dissatisfied	510192563	d5d46a3e-7b86-4d06-9bd1-cc859a40f542	2025-07-03 20:03:07			submitted_via_web		vg72TbC2cYx2XL4zA5ftJK		uuid:d5d46a3e-7b86-4d06-9bd1-cc859a40f542	192
31	Male	Single	Tertiary education	Self-employed	Sibling	50,000-100,000	Less than 6 months	Always	Always	Sometimes	Never	Always	Always	Always	Never	Dissatisfied	Very satisfied	Dissatisfied	Very satisfied	Very dissatisfied	Dissatisfied	Dissatisfied	Neutral	510193191	68de25aa-1721-4c11-ad97-b6e9cb275594	2025-07-03 20:04:16			submitted_via_web		vg72TbC2cYx2XL4zA5ftJK		uuid:68de25aa-1721-4c11-ad97-b6e9cb275594	193
50	Female	Widowed	Primary education	Self-employed	Parent	Below 20,000	1-3 years	Quite often	Always	Never	Always	Always	Always	Always	Never	Dissatisfied	Very satisfied	Dissatisfied	Very satisfied	Very dissatisfied	Satisfied	Very dissatisfied	Very satisfied	510193820	cf2b5c21-a86c-4fc4-9deb-894f3138a7d2	2025-07-03 20:05:49			submitted_via_web		vg72TbC2cYx2XL4zA5ftJK		uuid:cf2b5c21-a86c-4fc4-9deb-894f3138a7d2	194
49	Female	Married	Secondary education	Self-employed	Parent	20,000-50,000	1-3 years	Never	Always	Never	Never	Always		Sometimes	Never	Dissatisfied	Very satisfied	Very satisfied	Very satisfied	Very dissatisfied	Very satisfied	Dissatisfied	Neutral	510194803	6363c6a6-2fc9-4f99-985d-9a62039420f7	2025-07-03 20:08:12			submitted_via_web		vg72TbC2cYx2XL4zA5ftJK		uuid:6363c6a6-2fc9-4f99-985d-9a62039420f7	195
20	Female	Married	Secondary education	Employed (full-time)	Sibling	20,000-50,000	Less than 6 months	Never	Always	Never	Never	Never	Always	Always	Never	Very satisfied	Very satisfied	Very satisfied	Very satisfied	Satisfied	Very satisfied	Very satisfied	Very satisfied	510195099	d218e7b7-0582-4fff-a791-600e8ca2fa12	2025-07-03 20:09:09			submitted_via_web		vg72TbC2cYx2XL4zA5ftJK		uuid:d218e7b7-0582-4fff-a791-600e8ca2fa12	196
35	Female	Married	Secondary education	Employed (full-time)	Sibling	20,000-50,000	1-3 years	Always	Never	Never	Never	Never	Never	Never	Never	Very satisfied	Very satisfied	Very satisfied	Very satisfied	Very satisfied	Very satisfied	Very satisfied	Very satisfied	510195479	dbe600c4-453a-4a59-a42d-41133f631475	2025-07-03 20:10:04			submitted_via_web		vg72TbC2cYx2XL4zA5ftJK		uuid:dbe600c4-453a-4a59-a42d-41133f631475	197
28	Male	Single	Tertiary education	Employed (full-time)	Sibling	Above 100,000	1-3 years	Never	Sometimes	Never	Always	Always	Always	Always	Never	Very satisfied	Very satisfied	Very satisfied	Very satisfied	Very dissatisfied	Very satisfied	Very satisfied	Very satisfied	510196300	22e3e0fe-2457-4c38-a899-7f7554cf4495	2025-07-03 20:12:17			submitted_via_web		vg72TbC2cYx2XL4zA5ftJK		uuid:22e3e0fe-2457-4c38-a899-7f7554cf4495	198
33	Male	Single	Secondary education	Unemployed	Sibling	50,000-100,000	6 months to 1 year	Never	Always	Never	Always	Always	Always	Always	Never	Very satisfied	Very satisfied	Dissatisfied	Very satisfied	Very dissatisfied	Very satisfied	Dissatisfied	Dissatisfied	510197047	f3dab832-d043-401a-8150-2bd71502ada9	2025-07-03 20:14:20			submitted_via_web		vg72TbC2cYx2XL4zA5ftJK		uuid:f3dab832-d043-401a-8150-2bd71502ada9	199
70	Female	Married	Tertiary education	Employed (full-time)	Parent	Below 20,000	Less than 6 months	Never	Sometimes	Never	Quite often	Always	Always	Always	Never	Very satisfied	Satisfied	Satisfied	Satisfied	Very dissatisfied	Neutral	Very satisfied	Satisfied	510197545	16b2457e-fbee-4ae7-bbef-bc3a83c3948f	2025-07-03 20:15:47			submitted_via_web		vg72TbC2cYx2XL4zA5ftJK		uuid:16b2457e-fbee-4ae7-bbef-bc3a83c3948f	200
40	Female	Married	Secondary education	Self-employed	Sibling	20,000-50,000	6 months to 1 year	Never	Never	Never	Never	Never	Never	Never	Never	Very satisfied	Very satisfied	Very satisfied	Very satisfied	Very dissatisfied	Very dissatisfied	Neutral	Very satisfied	510197888	00663a0d-e898-47c4-b9b9-f061e1841080	2025-07-03 20:16:57			submitted_via_web		vg72TbC2cYx2XL4zA5ftJK		uuid:00663a0d-e898-47c4-b9b9-f061e1841080	201
49	Female	Married	Secondary education	Self-employed	Parent	20,000-50,000	More than 3 years	Always	Always	Quite often	Always	Always	Always	Always	Quite often	Neutral	Neutral	Very dissatisfied	Neutral	Very dissatisfied	Dissatisfied	Very dissatisfied	Dissatisfied	510198225	73f9982c-c72e-4c45-abe6-6a33b1eced12	2025-07-03 20:17:49			submitted_via_web		vg72TbC2cYx2XL4zA5ftJK		uuid:73f9982c-c72e-4c45-abe6-6a33b1eced12	202
38	Female	Married	Secondary education	Self-employed	Child		Less than 6 months	Never	Never	Never	Never	Rarely	Never	Never	Never	Very satisfied	Very satisfied	Very satisfied	Very satisfied	Satisfied	Satisfied	Very satisfied	Satisfied	510198545	2f486fce-5782-473c-809e-8848c09d45d2	2025-07-03 20:18:51			submitted_via_web		vg72TbC2cYx2XL4zA5ftJK		uuid:2f486fce-5782-473c-809e-8848c09d45d2	203
27	Male	Married	Secondary education	Employed (part-time)	Sibling	20,000-50,000	Less than 6 months	Never	Sometimes	Never	Sometimes	Always	Never	Never	Never	Very satisfied	Very satisfied	Very satisfied	Very satisfied	Very satisfied	Very satisfied	Very satisfied	Very satisfied	510198827	21bf3e85-6300-47c8-b3d1-944abb7c603f	2025-07-03 20:19:41			submitted_via_web		vg72TbC2cYx2XL4zA5ftJK		uuid:21bf3e85-6300-47c8-b3d1-944abb7c603f	204
55	Female	Married	Tertiary education	Employed (full-time)	Child	Above 100,000	1-3 years	Sometimes	Quite often	Never	Always	Sometimes	Never	Sometimes		Satisfied	Satisfied	Satisfied	Dissatisfied	Dissatisfied		Satisfied	Satisfied	510199103	111429e5-aa4f-405b-adc9-2f45929e3dbb	2025-07-03 20:20:39			submitted_via_web		vg72TbC2cYx2XL4zA5ftJK		uuid:111429e5-aa4f-405b-adc9-2f45929e3dbb	205
30	Female	Single	Tertiary education	Employed (full-time)	Sibling	50,000-100,000	More than 3 years	Sometimes	Always	Never	Always	Rarely	Never	Never	Never	Very satisfied	Very satisfied	Very satisfied	Very satisfied	Very dissatisfied	Very satisfied	Very satisfied	Very satisfied	510200022	d1d29d76-1cc5-4c7e-b423-acf1d398592b	2025-07-03 20:23:29			submitted_via_web		vg72TbC2cYx2XL4zA5ftJK		uuid:d1d29d76-1cc5-4c7e-b423-acf1d398592b	206
40	Male	Single	Tertiary education	Self-employed	Sibling		6 months to 1 year	Never	Sometimes	Never	Quite often	Quite often	Sometimes	Sometimes	Never	Satisfied	Satisfied	Satisfied	Satisfied	Neutral	Satisfied	Neutral	Neutral	510200447	d45f28f6-04f8-496c-a1d9-11c5ffa41d61	2025-07-03 20:24:31			submitted_via_web		vg72TbC2cYx2XL4zA5ftJK		uuid:d45f28f6-04f8-496c-a1d9-11c5ffa41d61	207
40	Male	Married	Tertiary education	Employed (full-time)	Sibling	Below 20,000	1-3 years	Never	Sometimes	Never	Rarely	Never	Never	Never	Never	Very satisfied	Very satisfied	Satisfied	Very satisfied	Very satisfied	Very satisfied	Neutral	Very satisfied	510200945	de61e7fe-5abd-4b21-8a63-9896b70c54c2	2025-07-03 20:25:26			submitted_via_web		vg72TbC2cYx2XL4zA5ftJK		uuid:de61e7fe-5abd-4b21-8a63-9896b70c54c2	208
57	Male	Married	Primary education	Self-employed	Spouse	20,000-50,000	6 months to 1 year	Never	Quite often	Never	Sometimes	Always	Sometimes	Quite often	Never	Very satisfied	Very satisfied	Very satisfied	Very satisfied	Very dissatisfied	Very satisfied	Dissatisfied	Very satisfied	510201741	4e9b4971-ad31-446f-8e5a-6e3e302bfb13	2025-07-03 20:27:25			submitted_via_web		vg72TbC2cYx2XL4zA5ftJK		uuid:4e9b4971-ad31-446f-8e5a-6e3e302bfb13	209
	Female	Single	Tertiary education	Unemployed	Child	Below 20,000	1-3 years	Never	Sometimes	Sometimes	Sometimes	Rarely	Always	Always	Sometimes	Very satisfied	Neutral	Neutral	Neutral	Neutral	Neutral	Neutral	Dissatisfied	510202066	e89b730a-c335-4049-ac7a-7fc96981c9f5	2025-07-03 20:28:19			submitted_via_web		vg72TbC2cYx2XL4zA5ftJK		uuid:e89b730a-c335-4049-ac7a-7fc96981c9f5	210
	Male	Married	Tertiary education	Self-employed	Sibling	Above 100,000	Less than 6 months	Never	Sometimes	Never	Quite often	Sometimes	Quite often	Sometimes	Sometimes	Satisfied	Satisfied	Satisfied	Very satisfied	Satisfied	Satisfied	Satisfied	Satisfied	510202365	9cef5f02-4d12-4c42-9cba-5ae36aeace2b	2025-07-03 20:29:06			submitted_via_web		vg72TbC2cYx2XL4zA5ftJK		uuid:9cef5f02-4d12-4c42-9cba-5ae36aeace2b	211
27	Male	Married	Primary education	Self-employed	Sibling	Above 100,000	More than 3 years	Rarely	Never	Never	Never	Never	Never	Never	Never	Very satisfied	Very satisfied	Very satisfied	Very satisfied	Very satisfied	Very satisfied	Very satisfied	Very satisfied	510202663	4bba9015-ce7f-4ebe-819a-0d0294defb18	2025-07-03 20:29:51			submitted_via_web		vg72TbC2cYx2XL4zA5ftJK		uuid:4bba9015-ce7f-4ebe-819a-0d0294defb18	212
70	Female	Widowed	Primary education	Unemployed	Parent	Below 20,000	More than 3 years	Sometimes	Always	Never	Sometimes	Always	Quite often	Sometimes	Never	Very satisfied	Very satisfied	Very satisfied	Very satisfied	Very satisfied	Satisfied	Neutral	Very satisfied	510203563	f78ab794-ac22-4ac2-8b14-b64e16a02383	2025-07-03 20:32:22			submitted_via_web		vg72TbC2cYx2XL4zA5ftJK		uuid:f78ab794-ac22-4ac2-8b14-b64e16a02383	213
52	Male	Married	Tertiary education	Self-employed	Spouse	Above 100,000	Less than 6 months	Always	Always	Never	Always	Always	Never	Always	Never	Very satisfied	Very satisfied	Dissatisfied	Very satisfied	Very dissatisfied	Neutral	Very satisfied	Very satisfied	510203874	6c4f1293-abec-43c0-91f1-b16647dc21f4	2025-07-03 20:33:12			submitted_via_web		vg72TbC2cYx2XL4zA5ftJK		uuid:6c4f1293-abec-43c0-91f1-b16647dc21f4	214
